# Supplementary material
Source: PubMed Central journal article supplement (PMC10262820)
Supplement: NIHMS1895875-supplement-Supplementary_Information.pdf [file NIHMS1895875-supplement-Supplementary_Information.pdf]

## Supplementary information for

# Ancient defensive terpene biosynthetic gene clusters in the soft corals

Paul D. Scesa, Zhenjian Lin, Eric W. Schmidt\*

## Supplementary Results

|                                                                                                                                       |    |
|---------------------------------------------------------------------------------------------------------------------------------------|----|
| Supplementary Figure 1. Multiple sequence alignment for HMM profile. ....                                                             | 2  |
| Supplementary Figure 2. GCMS data for compounds 4, 5 and <sup>2</sup> H <sub>2</sub> -4. ....                                         | 3  |
| Supplementary Figure 3. Schematic summary of scaled-up enzyme reaction. ....                                                          | 4  |
| Supplementary Table 1. Protein sequences used to build HMM profile .....                                                              | 5  |
| Supplementary Table 2. Results from i-TASSER modelling of EcTPS1.....                                                                 | 6  |
| Supplementary Table 3. Accession numbers for <i>E. caribaeorum</i> genes .....                                                        | 7  |
| Supplementary Table 4. Gene annotations for <i>elu</i> cluster contig. ....                                                           | 8  |
| Supplementary Table 5. SRA data used in this study. ....                                                                              | 9  |
| Supplementary Table 6. Results from i-TASSER modelling of EcAT1.....                                                                  | 12 |
| Supplementary Table 7. Primers used in this study. ....                                                                               | 13 |
| Supplementary Note 1: Synthetic methods and compound characterization .....                                                           | 14 |
| General methods for NMR spectroscopy.....                                                                                             | 14 |
| Synthesis of substrates for enzyme reactions .....                                                                                    | 14 |
| Structure elucidation of enzyme reaction products.....                                                                                | 14 |
| Mechanistic study of eunicellane skeleton formation.....                                                                              | 16 |
| Supplementary Note Scheme 1. Synthesis of oligoprenyl pyrophosphates.....                                                             | 17 |
| Supplementary Note Figure 1. <sup>1</sup> H NMR spectrum of 4 in CDCl <sub>3</sub> at 500 MHz.....                                    | 18 |
| Supplementary Note Figure 2. <sup>13</sup> C NMR spectrum of 4 in CDCl <sub>3</sub> at 125 MHz.....                                   | 19 |
| Supplementary Note Figure 3. <sup>1</sup> H- <sup>13</sup> C HSQC NMR spectrum of 4 and 1,14- <sup>2</sup> H <sub>2</sub> -4 ..       | 20 |
| Supplementary Note Figure 4. <sup>1</sup> H NMR spectrum of 9 in CDCl <sub>3</sub> at 500 MHz.....                                    | 21 |
| Supplementary Note Figure 5. <sup>1</sup> H- <sup>13</sup> C HSQC NMR spectrum of 5 in CDCl <sub>3</sub> at 500 MHz. ....             | 22 |
| Supplementary Note Figure 6. <sup>1</sup> H NMR spectrum of 1,14- <sup>2</sup> H <sub>2</sub> -4 in CDCl <sub>3</sub> at 500 MHz..... | 23 |
| Supplementary Note Figure 7. <sup>1</sup> H DPGSE 1D TOCSY NMR spectrum of 1,14- <sup>2</sup> H <sub>2</sub> -4.....                  | 24 |
| Supplementary Note Figure 8. 1D slices from HMBC NMR spectrum of 4 and 1,14- <sup>2</sup> H <sub>2</sub> -4.....                      | 25 |
| Supplementary Note Table 1. <sup>1</sup> H and <sup>13</sup> C-NMR data for 4 in CDCl <sub>3</sub> at 500 MHz.....                    | 26 |
| Supplementary Note Table 2. <sup>1</sup> H and <sup>13</sup> C-NMR data for 5a and 5b in CDCl <sub>3</sub> at 500 MHz.....            | 27 |
| Supplementary Note 2: Computational chemistry methods and data .....                                                                  | 28 |
| Computational methods .....                                                                                                           | 28 |
| Supplementary Note Table 1. Atomic coordinates and energies for intermediate A <sup>+</sup> .....                                     | 29 |
| Supplementary Note Table 2. Atomic coordinates and energies for transition state TS <sub>AB</sub> . ....                              | 30 |
| Supplementary Note Table 3. Atomic coordinates and energies for intermediate B <sup>+</sup> . ....                                    | 31 |
| Supplementary Note Table 4. Atomic coordinates and energies for transition state TS <sub>BC</sub> .....                               | 32 |
| Supplementary Note Table 5. Atomic coordinates and energies for intermediate C <sup>+</sup> . ....                                    | 33 |
| Supplementary Note Table 6. Atomic coordinates and energies for transition state TS <sub>CD</sub> . ....                              | 34 |
| Supplementary Note Table 7. Atomic coordinates and energies for intermediate D <sup>+</sup> .....                                     | 35 |
| References.....                                                                                                                       | 36 |

## Supplementary Results

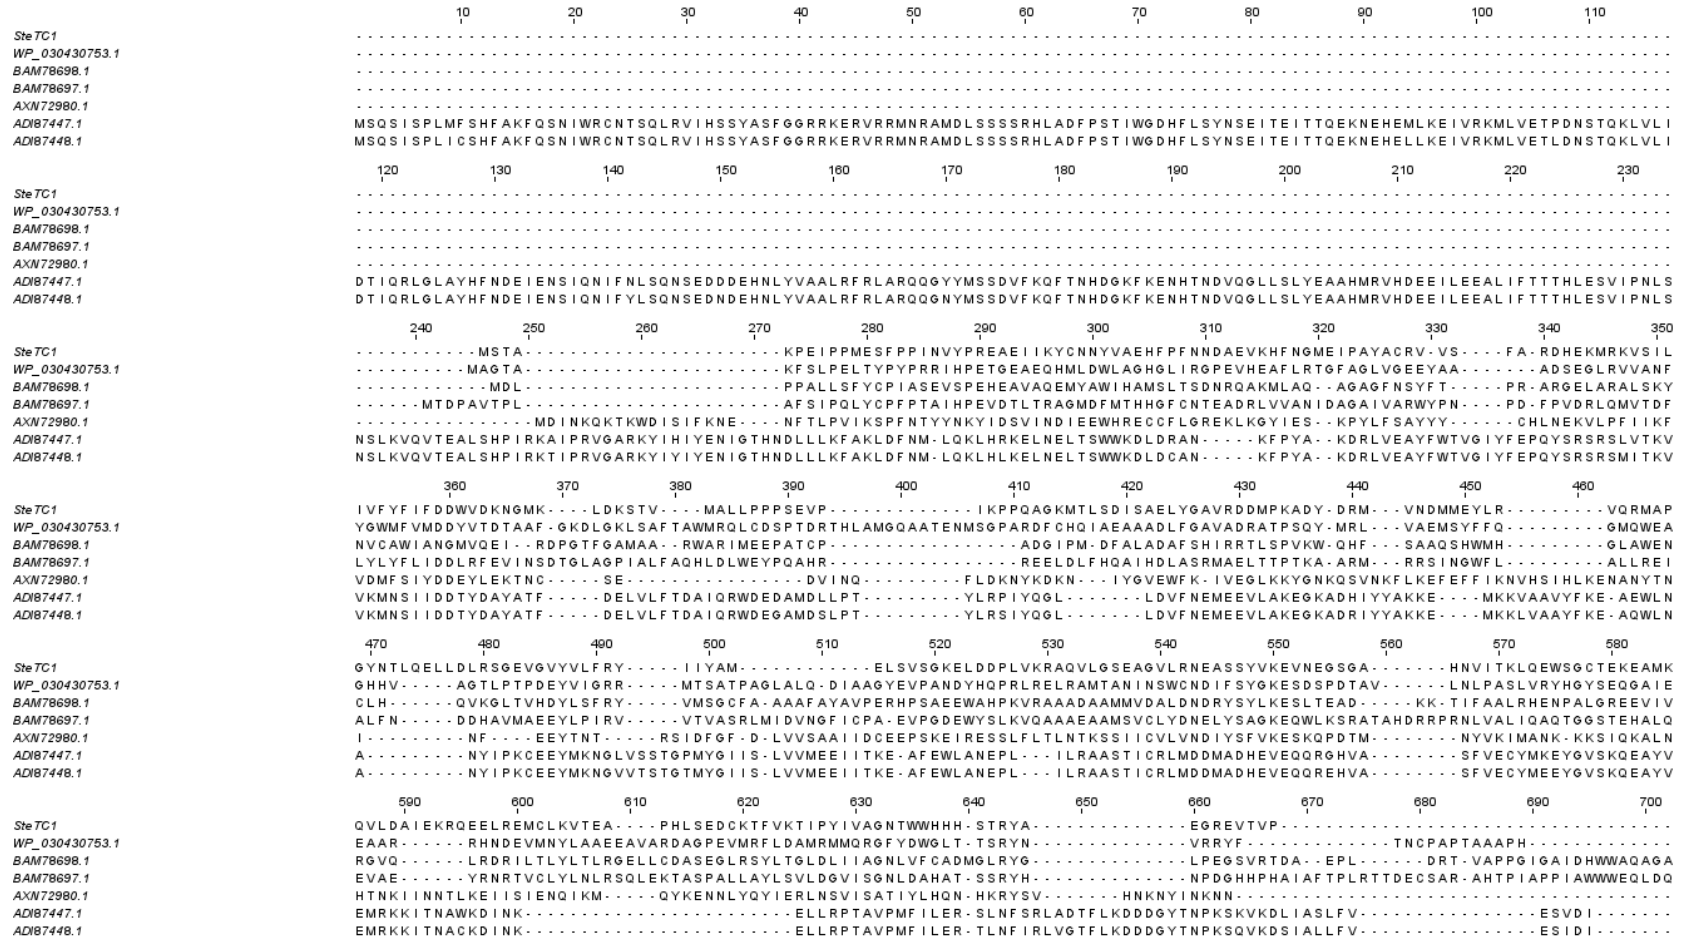

**Supplementary Figure 1.** Multiple sequence alignment of protein sequences from known cembrane producers used to build HMM profile.

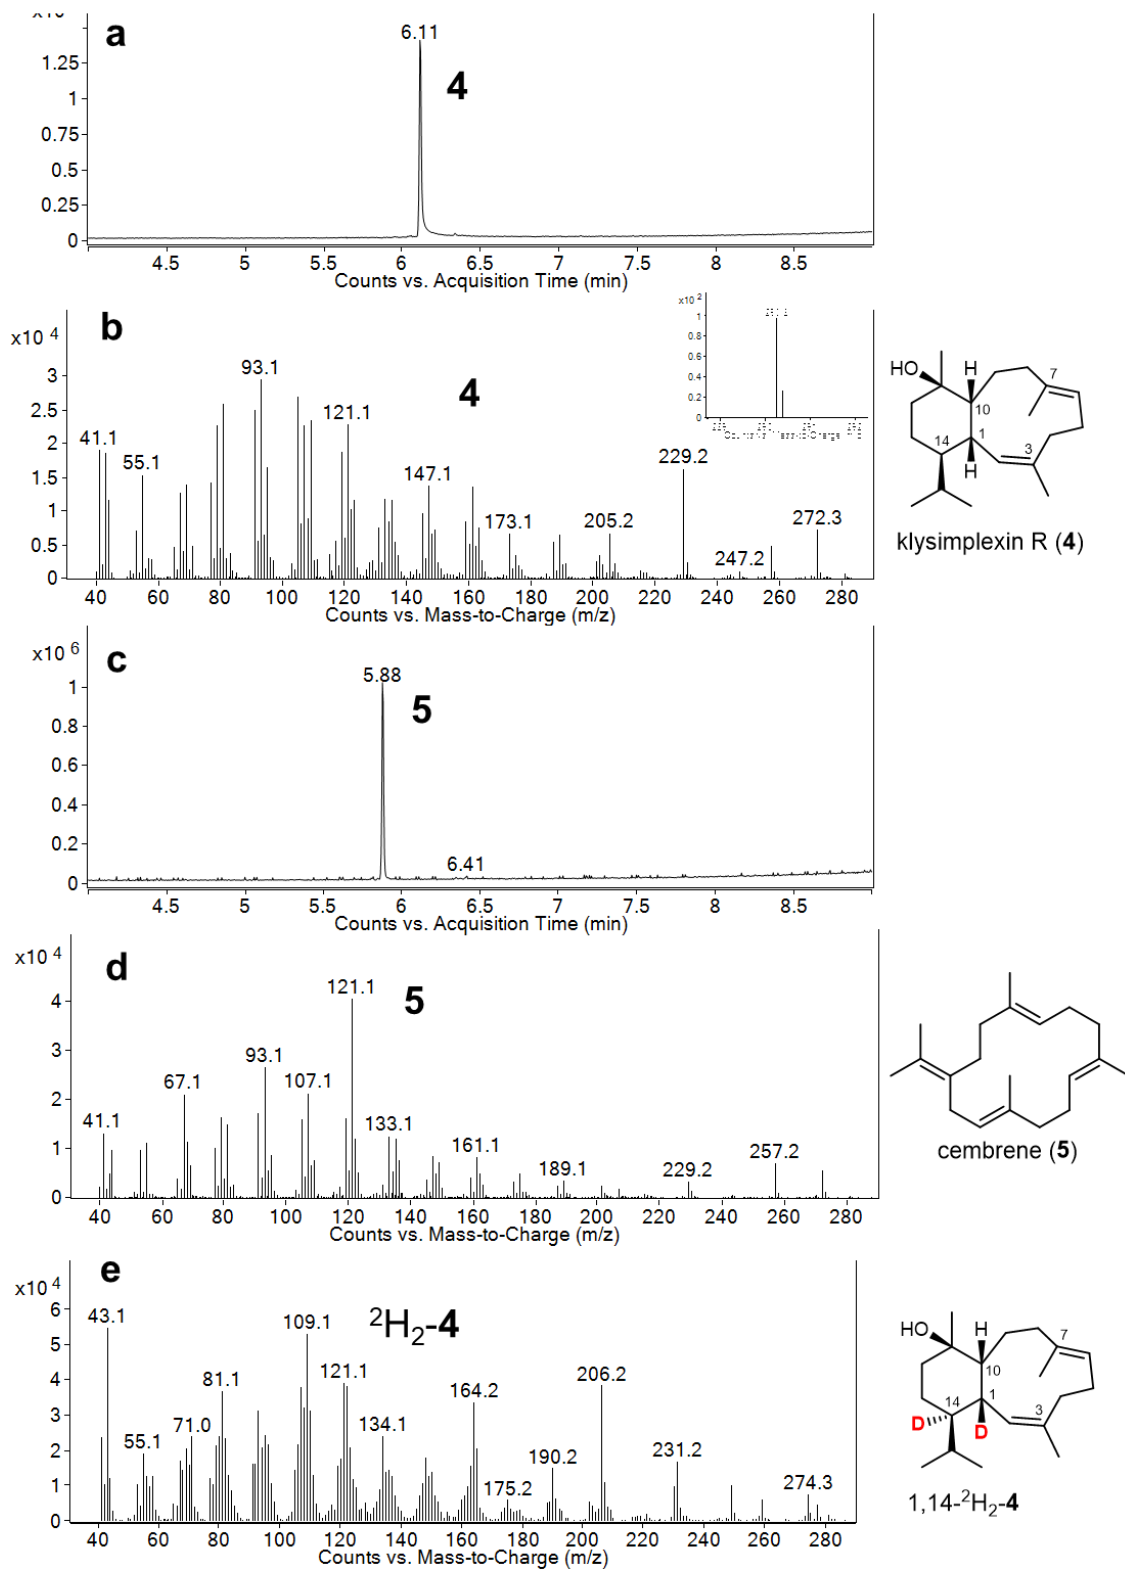

**Supplementary Figure 2.** GCMS data for compounds **4**, **5** and <sup>2</sup>H<sub>2</sub>-**4**. **a)** GCMS TIC trace for **4**. **b)** EIMS spectrum for **4**. **c)** GCMS TIC trace for **5**. **d)** EIMS spectrum for **5**. **e)** EIMS spectrum for <sup>2</sup>H<sub>2</sub>-**4**.

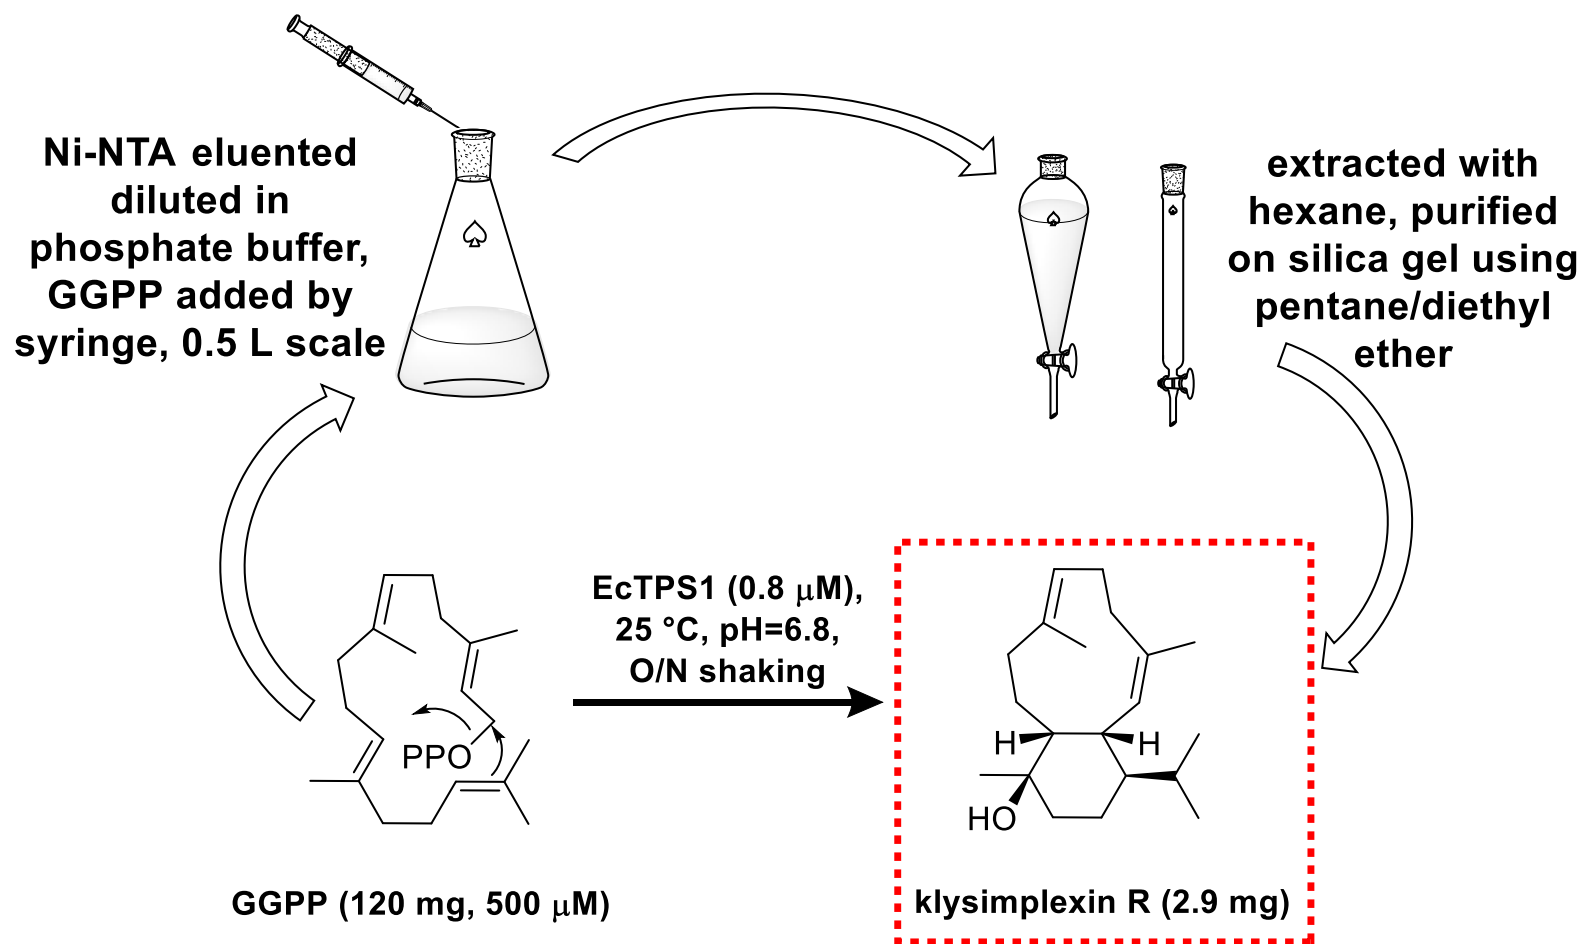

**Supplementary Figure 3.** Schematic summary of scaled-up enzyme reaction used to produce milligram quantities of diterpenoids for structural characterization.

**Supplementary Table 1.** Protein sequences used to build multiple sequence alignment and hidden Markov models. Proteins were selected based on experimental evidence for the enzymatic production of cembranoids, which are structurally related to octocoral metabolites.

| Name    | Accession #    | Species                                       | Product                                                     | Ref. |
|---------|----------------|-----------------------------------------------|-------------------------------------------------------------|------|
| DtcycA  | BAM78698.1     | <i>Streptomyces sp. SANK 60404</i> (bacteria) | (-)-(R)-Nephtenol and cembrene isomer <b>9</b> <sup>b</sup> | 12   |
| DtcycB  | BAM78697.1     | <i>Streptomyces sp. SANK 60404</i> (bacteria) | (-)-(R)-Nephtenol and (-)-(R)-Cembrene A <sup>b</sup>       | 12   |
| CAS     | WP_030430753.1 | <i>Allokutzneria albata</i> (bacteria)        | (+)-(S)-Cembrene A <sup>b</sup>                             | 26   |
| CBTS 2b | ADI87447.1     | <i>Nicotiana sylvestris</i> (plant)           | Cembratrienols <sup>c</sup>                                 | 27   |
| CBTS 3  | ADI87448.1     | <i>Nicotiana sylvestris</i> (plant)           | Cembratrienols <sup>c</sup>                                 | 27   |
| SteTC1  | <sup>a</sup>   | <i>Stereum histurum</i> (fungus)              | (-)-(R)-Nephtenol <sup>b</sup>                              | 28   |
| DpTPS11 | AXN72980.1     | <i>Dictyostelium purpureum</i> (amoeba)       | (+)-(S)-Nephtenol <sup>b</sup>                              | 29   |

<sup>a</sup>Accessed directly from Ref. 6 (found in supplemental information). <sup>b</sup>Supported by heterologous expression. <sup>c</sup>supported by gene knockout.

**Supplementary Table 2.** Results from i-TASSER modelling of EcTPS1 showing top 10 most similar structures from PDB, from both bacteria and plants.

| Rank | PDB Hit | TM-score | RMSD | IDEN  | Cov   | Originating species                                               |
|------|---------|----------|------|-------|-------|-------------------------------------------------------------------|
| 1    | 4okmA   | 0.779    | 1.85 | 0.141 | 0.810 | <i>Streptomyces pristinaespiralis</i><br>ATCC 25486<br>(bacteria) |
| 2    | 6tbdA   | 0.737    | 2.45 | 0.124 | 0.788 | <i>Streptomyces</i><br>sp. CWA1<br>(bacteria)                     |
| 3    | 3kb9A   | 0.692    | 2.59 | 0.116 | 0.759 | <i>Streptomyces coelicolor</i><br>(bacteria)                      |
| 4    | 3v1vA   | 0.691    | 2.67 | 0.114 | 0.754 | <i>Streptomyces coelicolor</i><br>A3(2) (bacteria)                |
| 5    | 6vkzA   | 0.684    | 3.10 | 0.138 | 0.771 | <i>Pseudo-nitzschia multiseriis</i><br>(bacteria)                 |
| 6    | 5a0iA   | 0.683    | 2.14 | 0.117 | 0.734 | <i>Streptomyces</i><br>sp. (bacteria)                             |
| 7    | 4zq8A   | 0.681    | 2.87 | 0.140 | 0.749 | <i>Streptomyces lydicus</i><br>(bacteria)                         |
| 8    | 1hm7B   | 0.673    | 2.15 | 0.099 | 0.722 | <i>Streptomyces exfoliates</i><br>(bacteria)                      |
| 9    | 6q4sA   | 0.672    | 2.56 | 0.097 | 0.737 | <i>Streptomyces chartreusis</i><br>NRRL 3882<br>(bacteria)        |
| 10   | 5uv0A   | 0.671    | 3.35 | 0.100 | 0.773 | <i>Citrus sinensis</i><br>(plant)                                 |

**Supplementary Table 3.** Accession numbers for *E. caribaeorum* genes and sequences reported in this study

| Name                                        | Accession # | Description                                          |
|---------------------------------------------|-------------|------------------------------------------------------|
| <i>E. caribaeorum</i> transcriptome         | SRR15783032 | SRA/raw reads of <i>E. caribaeorum</i> transcriptome |
| <i>E. caribaeorum</i> specimen 1 metagenome | SRR15817518 | SRA/raw reads of <i>E. caribaeorum</i> metagenome    |
| <i>E. caribaeorum</i> specimen 2 metagenome | SRR15817517 | SRA/raw reads of <i>E. caribaeorum</i> metagenome    |
| EcTPS1                                      | OK081311    | CDS                                                  |
| EcTPS6_contig                               | OK081312    | Genomic contig                                       |
| EcTPS2                                      | OK081313    | CDS                                                  |
| EcTPS3                                      | OK081314    | CDS                                                  |
| EcTPS4                                      | OK081315    | CDS                                                  |
| EcTPS4_1                                    | OK081316    | CDS                                                  |
| EcTPS5                                      | OK081317    | CDS                                                  |
| EcTPS7                                      | OK081318    | CDS                                                  |
| EcTPS8                                      | OK081319    | CDS                                                  |
| Dinoflagellate_TS                           | OK081320    | CDS                                                  |

**Supplementary Table 4.** Gene annotations for *elu* cluster contig by eggNOG-mapper (1.0.3-3-g3e22728).

| Name   | Length | Effective Length | TPM         | #Reads  | seed_eggNOG_ortholog          | seed ortholog evalue | seed ortholog score | predicted gene name | KEGG_KOs      | eggNOG annot                                                          |
|--------|--------|------------------|-------------|---------|-------------------------------|----------------------|---------------------|---------------------|---------------|-----------------------------------------------------------------------|
| g1.t1  | 2824   | 2618.453         | 235.622667  | 83      | 45351.NEMVEDRAFT_v1g91817-PA  | 1.60E-130            | 427.6               | RXFP1               | K04306,K04307 | Relaxin insulin-like family peptide receptor                          |
| g2.t1  | 288    | 91.309           | 19945.0362  | 245     | 6334.EFV56619                 | 3.20E-36             | 112.8               |                     | K14803        | PP2Cc                                                                 |
| g3.t1  | 342    | 139.386          | 0           | 0       |                               |                      |                     |                     |               |                                                                       |
| g4.t1  | 531    | 325.456          | 2238.294772 | 98      | 7739.JGI235627                | 7.70E-65             | 211.3               |                     | K14803        | protein phosphatase, Mg <sup>2+</sup> Mn <sup>2+</sup> dependent      |
| g5.t1  | 648    | 442.456          | 33.600355   | 2       | 13735.ENSPSIP00000001475      | 4.60E-24             | 74.7                |                     |               | Reverse transcriptase (RNA-dependent DNA polymerase)                  |
| g6.t1  | 426    | 220.592          | 303.275544  | 9       |                               |                      |                     |                     |               |                                                                       |
| g7.t1  | 3645   | 3439.453         | 153.444995  | 71      | 9785.ENSLAFP00000004252       | 1.60E-160            | 531.2               | TBC1D1              | K18341        | ecotropic viral integration site                                      |
| g8.t1  | 6012   | 5806.453         | 48.647042   | 38      |                               |                      |                     |                     |               |                                                                       |
| g9.t1  | 783    | 577.453          | 0           | 0       | 7897.ENSLACP000000019709      | 1.90E-29             | 93.2                |                     |               | Endonuclease-reverse transcriptase HmRTE-e01                          |
| g10.t1 | 297    | 99.286           | 0           | 0       | 7897.ENSLACP00000007560       | 1.90E-21             | 68.3                |                     |               | Inherit from KOG: Cytochrome p450                                     |
| g11.t1 | 546    | 340.456          | 0           | 0       |                               |                      |                     |                     |               |                                                                       |
| g12.t1 | 456    | 250.567          | 0           | 0       | 8090.ENSORLP000000024868      | 4.20E-41             | 131.2               |                     |               | Inherit from NOG: Retroelement                                        |
| g13.t1 | 1836   | 1630.453         | 351.047751  | 77      | 45351.NEMVEDRAFT_v1g168885-PA | 0                    | 1078.2              | IARS                | K01870        | isoleucyltRNA synthetase                                              |
| g14.t1 | 249    | 61.247           | 2063.242038 | 17      |                               |                      |                     |                     |               |                                                                       |
| g15.t1 | 1533   | 1327.453         | 2777.450167 | 496     | 45351.NEMVEDRAFT_v1g168885-PA | 1.20E-169            | 559.4               | IARS                | K01870        | isoleucyltRNA synthetase                                              |
| g16.t1 | 1554   | 1348.453         | 485.099259  | 88      | 313624.N9414_06939            | 5.60E-23             | 71.1                |                     |               | condensation domain protein                                           |
| g17.t1 | 1221   | 1015.453         | 944.307921  | 129     |                               |                      |                     |                     |               | should be terpene cyclase                                             |
| g18.t1 | 291    | 93.841           | 633.695411  | 8       |                               |                      |                     |                     |               |                                                                       |
| g19.t1 | 1479   | 1273.453         | 828.875257  | 142     | 45351.NEMVEDRAFT_v1g234104-PA | 1.20E-81             | 268.3               | CYP1B1              | K07408        | cytochrome P450, family 1, subfamily                                  |
| g20.t1 | 357    | 153.044          | 0           | 0       |                               |                      |                     |                     |               |                                                                       |
| g21.t1 | 345    | 142.162          | 0           | 0       | 13616.ENSMODP000000039345     | 3.00E-21             | 65.4                |                     |               | NA                                                                    |
| g22.t1 | 861    | 655.453          | 11.340761   | 1       |                               |                      |                     |                     |               |                                                                       |
| g23.t1 | 519    | 313.456          | 0           | 0       | 400682.PAC_15700797           | 5.10E-59             | 189.8               |                     |               | Reverse transcriptase                                                 |
| g24.t1 | 435    | 229.591          | 129.505504  | 4       | 400682.PAC_15700797           | 3.40E-32             | 102.6               |                     |               | Reverse transcriptase                                                 |
| g25.t1 | 1797   | 1591.453         | 1237.758196 | 265     | 45351.NEMVEDRAFT_v1g213886-PA | 3.40E-203            | 671                 | GK                  | K00864        | Glycerol kinase                                                       |
| g26.t1 | 1773   | 1567.453         | 588.045474  | 124     | 7668.SPU_013953tr             | 1.00E-94             | 306.8               |                     | K18667        | CUE                                                                   |
| g27.t1 | 1023   | 817.453          | 0           | 0       | 7668.SPU_008342tr             | 3.40E-57             | 181.3               |                     |               | NA                                                                    |
| g28.t1 | 555    | 349.456          | 0           | 0       |                               |                      |                     |                     |               |                                                                       |
| g29.t1 | 537    | 331.456          | 112.131495  | 5       | 45351.NEMVEDRAFT_v1g223755-PA | 5.90E-36             | 116.6               | ASCC2               | K18667        | activating signal cointegrator 1 complex subunit 2                    |
| g30.t1 | 375    | 170.145          | 910373.9189 | 20838   | 45351.NEMVEDRAFT_v1g190935-PA | 1.40E-56             | 183.9               | RPS25               | K02975        | Ribosomal protein S25                                                 |
| g31.t1 | 348    | 144.849          | 21705.45266 | 422.961 | 45351.NEMVEDRAFT_v1g186304-PA | 1.90E-45             | 142.2               |                     |               | Calponin homology (CH) domain                                         |
| g32.t1 | 1179   | 973.453          | 2184.210838 | 286.039 | 9103.ENSMGAP000000015929      | 8.60E-58             | 190.2               | LRCH1               |               | Leucine-rich repeats and calponin homology (CH) domain containing     |
| g33.t1 | 1830   | 1624.453         | 21520.4616  | 4703    | 45351.NEMVEDRAFT_v1g88648-PA  | 2.90E-111            | 364.3               | SLC16A10            | K08187        | solute carrier family 16, member 10 (aromatic amino acid transporter) |
| g34.t1 | 258    | 67.687           | 219.638225  | 2       |                               |                      |                     |                     |               |                                                                       |
| g35.t1 | 1146   | 940.453          | 10875.897   | 1376    |                               |                      |                     |                     |               |                                                                       |



**Supplementary Table 5.** SRA data used in this study.

| SRA accession number | Class                     | Scientific Names                   |
|----------------------|---------------------------|------------------------------------|
| DRR253190            | <i>Dinophyceae</i>        | <i>Durusdinium trenchii</i>        |
| SRR8506632           | <i>Dinophyceae</i>        | <i>kawagutii</i>                   |
| SRR12021959          | <i>Heteroscleromorpha</i> | <i>Cliona orientalis</i>           |
| SRR6782832           | <i>Hexacorallia</i>       | <i>Agaricia lamarcki</i>           |
| SRR6820379           | <i>Hexacorallia</i>       | <i>Alveopora japonica</i>          |
| SRR5123105           | <i>Hexacorallia</i>       | <i>Amplexidiscus fenestrafer</i>   |
| ERR2192493           | <i>Hexacorallia</i>       | <i>Coelastrea aspera</i>           |
| SRR14295591          | <i>Hexacorallia</i>       | <i>Colpophyllia natans</i>         |
| ERR2190350           | <i>Hexacorallia</i>       | <i>Dipsastraea favus</i>           |
| ERR2190370           | <i>Hexacorallia</i>       | <i>Fungia fungites</i>             |
| ERR2191368           | <i>Hexacorallia</i>       | <i>Galaxea fascicularis</i>        |
| SRR4449115           | <i>Hexacorallia</i>       | <i>Goniopora columna</i>           |
| SRR14295593          | <i>Hexacorallia</i>       | <i>Montastraea cavernosa</i>       |
| SRR9330360           | <i>Hexacorallia</i>       | <i>Oculina patagonica</i>          |
| SRR14295588          | <i>Hexacorallia</i>       | <i>Orbicella faveolata</i>         |
| SRR10873896          | <i>Hexacorallia</i>       | <i>Pavona decussata</i>            |
| SRR12904788          | <i>Hexacorallia</i>       | <i>Pocillopora damicornis</i>      |
| SRR14295605          | <i>Hexacorallia</i>       | <i>Porites astreoides</i>          |
| SRR14295600          | <i>Hexacorallia</i>       | <i>Siderastrea siderea</i>         |
| SRR8297742           | <i>Hexacorallia</i>       | <i>Triactis producta</i>           |
| SRR7585363           | <i>Hexacorallia</i>       | <i>Zoanthus sp. QL-2018</i>        |
| SRR7174588           | <i>Octocorallia</i>       | <i>Briareum sp. 1 RRV-2018</i>     |
| SRR7174589           | <i>Octocorallia</i>       | <i>Briareum sp. 2 RRV-2018</i>     |
| SRR7174590           | <i>Octocorallia</i>       | <i>Briareum sp. 3 RRV-2018</i>     |
| SRR7174591           | <i>Octocorallia</i>       | <i>Briareum sp. 4 RRV-2018</i>     |
| SRR13925246          | <i>Octocorallia</i>       | <i>Callogorgia americana delta</i> |
| SRR8293935           | <i>Octocorallia</i>       | <i>Dendronephthya gigantea</i>     |
| SRR8486075           | <i>Octocorallia</i>       | <i>Eleutherobia rubra</i>          |
| SRR8486076           | <i>Octocorallia</i>       | <i>Eleutherobia rubra</i>          |
| SRR8486077           | <i>Octocorallia</i>       | <i>Eleutherobia rubra</i>          |
| SRR8486078           | <i>Octocorallia</i>       | <i>Eleutherobia rubra</i>          |
| SRR8486079           | <i>Octocorallia</i>       | <i>Eleutherobia rubra</i>          |
| SRR8486080           | <i>Octocorallia</i>       | <i>Eleutherobia rubra</i>          |
| SRR8486081           | <i>Octocorallia</i>       | <i>Eleutherobia rubra</i>          |
| SRR8486082           | <i>Octocorallia</i>       | <i>Eleutherobia rubra</i>          |
| SRR8486083           | <i>Octocorallia</i>       | <i>Eleutherobia rubra</i>          |
| SRR6039601           | <i>Octocorallia</i>       | <i>Eunicea calyculata</i>          |
| SRR6039602           | <i>Octocorallia</i>       | <i>Eunicea calyculata</i>          |
| SRR6039603           | <i>Octocorallia</i>       | <i>Eunicea calyculata</i>          |
| SRR6039604           | <i>Octocorallia</i>       | <i>Eunicea calyculata</i>          |
| SRR6039605           | <i>Octocorallia</i>       | <i>Eunicea calyculata</i>          |

|             |                     |                           |
|-------------|---------------------|---------------------------|
| SRR6039606  | <i>Octocorallia</i> | <i>Eunicea calyculata</i> |
| SRR12876609 | <i>Octocorallia</i> | <i>Eunicea flexuosa</i>   |
| SRR12876610 | <i>Octocorallia</i> | <i>Eunicea flexuosa</i>   |
| SRR12876613 | <i>Octocorallia</i> | <i>Eunicea flexuosa</i>   |
| SRR12876614 | <i>Octocorallia</i> | <i>Eunicea flexuosa</i>   |
| SRR12876620 | <i>Octocorallia</i> | <i>Eunicea flexuosa</i>   |
| SRR12876621 | <i>Octocorallia</i> | <i>Eunicea flexuosa</i>   |
| SRR12876622 | <i>Octocorallia</i> | <i>Eunicea flexuosa</i>   |
| SRR12876624 | <i>Octocorallia</i> | <i>Eunicea flexuosa</i>   |
| SRR12876625 | <i>Octocorallia</i> | <i>Eunicea flexuosa</i>   |
| SRR12876628 | <i>Octocorallia</i> | <i>Eunicea flexuosa</i>   |
| SRR12876629 | <i>Octocorallia</i> | <i>Eunicea flexuosa</i>   |
| SRR12876631 | <i>Octocorallia</i> | <i>Eunicea flexuosa</i>   |
| SRR12876632 | <i>Octocorallia</i> | <i>Eunicea flexuosa</i>   |
| SRR12876633 | <i>Octocorallia</i> | <i>Eunicea flexuosa</i>   |
| SRR12876635 | <i>Octocorallia</i> | <i>Eunicea flexuosa</i>   |
| SRR12876636 | <i>Octocorallia</i> | <i>Eunicea flexuosa</i>   |
| SRR12876637 | <i>Octocorallia</i> | <i>Eunicea flexuosa</i>   |
| SRR12876638 | <i>Octocorallia</i> | <i>Eunicea flexuosa</i>   |
| SRR12876639 | <i>Octocorallia</i> | <i>Eunicea flexuosa</i>   |
| SRR12876640 | <i>Octocorallia</i> | <i>Eunicea flexuosa</i>   |
| SRR12876644 | <i>Octocorallia</i> | <i>Eunicea flexuosa</i>   |
| SRR12876647 | <i>Octocorallia</i> | <i>Eunicea flexuosa</i>   |
| SRR12876648 | <i>Octocorallia</i> | <i>Eunicea flexuosa</i>   |
| SRR12876649 | <i>Octocorallia</i> | <i>Eunicea flexuosa</i>   |
| SRR12876650 | <i>Octocorallia</i> | <i>Eunicea flexuosa</i>   |
| SRR12876653 | <i>Octocorallia</i> | <i>Eunicea flexuosa</i>   |
| SRR12876654 | <i>Octocorallia</i> | <i>Eunicea flexuosa</i>   |
| SRR12876657 | <i>Octocorallia</i> | <i>Eunicea flexuosa</i>   |
| SRR12876658 | <i>Octocorallia</i> | <i>Eunicea flexuosa</i>   |
| SRR12876659 | <i>Octocorallia</i> | <i>Eunicea flexuosa</i>   |
| SRR12876660 | <i>Octocorallia</i> | <i>Eunicea flexuosa</i>   |
| SRR12876661 | <i>Octocorallia</i> | <i>Eunicea flexuosa</i>   |
| SRR12876663 | <i>Octocorallia</i> | <i>Eunicea flexuosa</i>   |
| SRR12876664 | <i>Octocorallia</i> | <i>Eunicea flexuosa</i>   |
| SRR935078   | <i>Octocorallia</i> | <i>Gorgonia ventalina</i> |
| SRR935079   | <i>Octocorallia</i> | <i>Gorgonia ventalina</i> |
| SRR935080   | <i>Octocorallia</i> | <i>Gorgonia ventalina</i> |
| SRR935081   | <i>Octocorallia</i> | <i>Gorgonia ventalina</i> |
| SRR935082   | <i>Octocorallia</i> | <i>Gorgonia ventalina</i> |
| SRR935083   | <i>Octocorallia</i> | <i>Gorgonia ventalina</i> |
| SRR935084   | <i>Octocorallia</i> | <i>Gorgonia ventalina</i> |
| SRR935085   | <i>Octocorallia</i> | <i>Gorgonia ventalina</i> |
| SRR935086   | <i>Octocorallia</i> | <i>Gorgonia ventalina</i> |
| SRR935087   | <i>Octocorallia</i> | <i>Gorgonia ventalina</i> |

|             |                     |                                    |
|-------------|---------------------|------------------------------------|
| SRR935088   | <i>Octocorallia</i> | <i>Gorgonia ventalina</i>          |
| SRR935089   | <i>Octocorallia</i> | <i>Gorgonia ventalina</i>          |
| ERR3040053  | <i>Octocorallia</i> | <i>Heliopora coerulea</i>          |
| ERR3040054  | <i>Octocorallia</i> | <i>Heliopora coerulea</i>          |
| SRR12587798 | <i>Octocorallia</i> | <i>Heliopora coerulea</i>          |
| SRR12587799 | <i>Octocorallia</i> | <i>Heliopora coerulea</i>          |
| SRR12587800 | <i>Octocorallia</i> | <i>Heliopora coerulea</i>          |
| SRR12587801 | <i>Octocorallia</i> | <i>Heliopora coerulea</i>          |
| SRR12587803 | <i>Octocorallia</i> | <i>Heliopora coerulea</i>          |
| SRR12587805 | <i>Octocorallia</i> | <i>Heliopora coerulea</i>          |
| SRR12587806 | <i>Octocorallia</i> | <i>Heliopora coerulea</i>          |
| SRR12587807 | <i>Octocorallia</i> | <i>Heliopora coerulea</i>          |
| SRR12587808 | <i>Octocorallia</i> | <i>Heliopora coerulea</i>          |
| SRR5949848  | <i>Octocorallia</i> | <i>Heliopora coerulea</i>          |
| SRR7521178  | <i>Octocorallia</i> | <i>Paramuricea biscaya</i>         |
| SRR7521179  | <i>Octocorallia</i> | <i>Paramuricea biscaya</i>         |
| SRR7521180  | <i>Octocorallia</i> | <i>Paramuricea biscaya</i>         |
| SRR7521181  | <i>Octocorallia</i> | <i>Paramuricea biscaya</i>         |
| ERR3664727  | <i>Octocorallia</i> | <i>Paramuricea clavata</i>         |
| ERR3664728  | <i>Octocorallia</i> | <i>Paramuricea clavata</i>         |
| ERR3664729  | <i>Octocorallia</i> | <i>Paramuricea clavata</i>         |
| ERR3664730  | <i>Octocorallia</i> | <i>Paramuricea clavata</i>         |
| SRR13925244 | <i>Octocorallia</i> | <i>Paramuricea sp. type B3</i>     |
| SRR12573942 | <i>Octocorallia</i> | <i>Sarcophyton trocheliophorum</i> |
| SRR12573944 | <i>Octocorallia</i> | <i>Sarcophyton trocheliophorum</i> |
| SRR12573945 | <i>Octocorallia</i> | <i>Sarcophyton trocheliophorum</i> |
| SRR12573946 | <i>Octocorallia</i> | <i>Sarcophyton trocheliophorum</i> |
| ERR3026434  | <i>Octocorallia</i> | <i>Sinularia cruciata</i>          |
| ERR3026435  | <i>Octocorallia</i> | <i>Tubipora musica</i>             |
| SRR9278440  | <i>Octocorallia</i> | <i>Xenia sp.</i>                   |
| SRR9278441  | <i>Octocorallia</i> | <i>Xenia sp.</i>                   |
| SRR9278446  | <i>Octocorallia</i> | <i>Xenia sp.</i>                   |
| SRR9278447  | <i>Octocorallia</i> | <i>Xenia sp.</i>                   |
| SRR8113906  | <i>Octocorallia</i> | <i>Xenia sp. KK-2018</i>           |
| SRR8113907  | <i>Octocorallia</i> | <i>Xenia sp. KK-2018</i>           |
| SRR8113908  | <i>Octocorallia</i> | <i>Xenia sp. KK-2018</i>           |
| SRR8113909  | <i>Octocorallia</i> | <i>Xenia sp. KK-2018</i>           |

**Supplementary Table 6.** Results from i-TASSER modelling of EcAT1 showing top 10 most similar structures from PDB.

| Rank | PDB Hit (Accession #) | TM-score | RMSD | IDEN  | Cov   | Description                                                                                                                   |
|------|-----------------------|----------|------|-------|-------|-------------------------------------------------------------------------------------------------------------------------------|
| 1    | 7kvw                  | 0.75     | 3.09 | 0.125 | 0.840 | Nonribosomal didomain (holo-PCP-C) acceptor bound state                                                                       |
| 2    | 3fp0                  | 0.75     | 4.11 | 0.095 | 0.888 | Structural and functional characterization of TRI3 Trichothecene 15-O-acetyltransferase from <i>Fusarium sporotrichioides</i> |
| 3    | 6n8e                  | 0.73     | 2.93 | 0.089 | 0.808 | Crystal structure of holo-ObiF1, a five domain nonribosomal peptide synthetase from <i>Burkholderia diffusa</i>               |
| 4    | 6ad3                  | 0.73     | 3.48 | 0.095 | 0.830 | Structural characterization of the condensation domain from monacolin K polyketide synthase MokA                              |
| 5    | 5u89                  | 0.72     | 3.30 | 0.097 | 0.822 | Crystal structure of a cross-module fragment from the dimodular NRPS DhbF                                                     |
| 6    | 6mfz                  | 0.72     | 3.01 | 0.097 | 0.801 | Crystal structure of dimodular LgrA in a condensation state                                                                   |
| 7    | 4zxh                  | 0.72     | 3.45 | 0.101 | 0.822 | Crystal structure of holo-AB3403 a four domain nonribosomal peptide synthetase from <i>Acinetobacter baumannii</i>            |
| 8    | 5t3e                  | 0.72     | 3.03 | 0.118 | 0.805 | Crystal structure of a nonribosomal peptide synthetase heterocyclization domain                                               |
| 9    | 5isw                  | 0.72     | 3.57 | 0.099 | 0.824 | Structure of the apo PCP-E didomain of the gramicidin S synthetase A                                                          |
| 10   | 4jn3                  | 0.71     | 2.94 | 0.107 | 0.793 | Crystal structures of the first condensation domain of the CDA synthetase                                                     |

**Supplementary Table 7.** Primers used in this study.

| Primer Name | Primer Sequence                         | Target Name | Restriction Sites |
|-------------|-----------------------------------------|-------------|-------------------|
| 308529      | ATGTCGCATGTCTATTTTGCATC                 | EcTPS1      |                   |
| 308530      | TTACATCAGGACACCATTGCC                   | EcTPS1      |                   |
| 309044      | TAAGCACATATGTCGCATGTCTATTTTGCATC        | EcTPS1      | NdeI/XhoI         |
| 309045      | TGCTTACTCGAGTTACATCAGGACACCATTGCC       | EcTPS1      | NdeI/XhoI         |
| 308527      | ATGGCATTTAGTAGGCCCTT                    | EcTPS2      |                   |
| 308528      | TTATTTTATCAAGAACAACCCGTCC               | EcTPS2      |                   |
| 308932      | TAAGCACATATGGCATTAGTAGGCCCTT            | EcTPS2      | NdeI/XhoI         |
| 308933      | TGCTTACTCGAGTTATTTTATCAAGAACAACCCGTCC   | EcTPS2      | NdeI/XhoI         |
| 308543      | ATGGCATGCAGTAAGGAATTG                   | EcTPS3      |                   |
| 308532      | TCATAGTTGTAGTAACTTGTCGAGG               | EcTPS3      |                   |
| 308934      | TAAGCACATATGGCATGCAGTAAGGAATTG          | EcTPS3      | NdeI/XhoI         |
| 308935      | TGCTTACTCGAGTCATAGTTGTAGTAACTTGTCGAGG   | EcTPS3      | NdeI/XhoI         |
| 308537      | ATGACGAACAAAAGCGAATTA                   | EcTPS5      |                   |
| 308538      | TCAAGCGGGCAATAGATTTG                    | EcTPS5      |                   |
| 308937      | TGCTTACTCGAGTCAAGCGGGCAATAGATTTG        | EcTPS5      | NdeI/NotI         |
| 308936      | TAAGCAGCTAGCATGACGAACAAAAGCGAATTA       | EcTPS5      | NdeI/NotI         |
| 308536      | ATGTTTCCTACAAGAGAAGTGC                  | EcTPS6      |                   |
| 308535      | TTAATTCAATCCATAGATTAACACC               | EcTPS6      |                   |
| 326330      | TAAGCAGCTAGCATGTTTCCTACAAGAGAAGTGC      | EcTPS6      | NdeI/NotI         |
| 326331      | TGCTTAGCGGCCGCTTAATTCAATCCATAGATTAACACC | EcTPS6      | NdeI/NotI         |

## Supplementary Note 1: Synthetic methods and compound characterization

### General methods for NMR spectroscopy

<sup>1</sup>H NMR and <sup>13</sup>C NMR spectra were recorded on a Varian iNOVA 500 (<sup>1</sup>H 500 MHz) NMR spectrometer equipped with a 3 mm Nalorac MDBG probe or Varian iNOVA 600 (<sup>1</sup>H 600 MHz) NMR spectrometer equipped with a 5 mm Varian inverse cold probe. <sup>31</sup>P NMR spectra were recorded on a Varian MERCURY 400 (<sup>1</sup>H 400 MHz) NMR spectrometer equipped with a 5 mm Nalorac broadband probe, operated using VNMRJ 4.2. Data was processed and analyzed using MestreNova 9.1.0.

### Synthesis of substrates for enzyme reactions

Synthetic methods are summarized in **Supplementary Note Scheme 1** and are based on reported methods, with changes as noted below<sup>1,2</sup>. Briefly, farnesyl chloride (**6**) was made from farnesol (**7**) by treating **7** with PCl<sub>3</sub> in place of PBr<sub>3</sub>. Synthesis of **8**, **9** and **10** proceeded as previously reported except that farnesylacetone (**9**) was purified by vacuum distillation instead of chromatography. Reduction of ester **10** was performed using either diisobutylaluminum hydride (DIBAL) or lithium aluminum deuteride (LiAlD<sub>4</sub>) to generate geranylgeraniol (GGOH) or deuterium labelled geranylgeraniol (D<sub>2</sub>-GGOH). The pyrophosphate source tris(tetrabutylammonium) hydrogen pyrophosphate (TTBAHPP) was generated by passing a solution of sodium pyrophosphate through a column of DOWEX 50W X8 (H<sup>+</sup> form) and titrating the resulting pyrophosphoric acid solution with tetrabutylammonium hydroxide to pH 7 as previously described. Preparation of GGPP from GGOH and TTBAHPP was performed as described allyl chloride **11** and provided a product with satisfactory <sup>1</sup>H, <sup>13</sup>C and <sup>31</sup>P-NMR spectra which was used for *in vitro* work without further purification after trituration from a mixture of acetonitrile and isopropanol. Preparation of D<sub>2</sub>-GGPP from D<sub>2</sub>-GGOH proceeded in a similar manner. Identity and purity of synthetic products were confirmed by analysis of <sup>1</sup>H and <sup>13</sup>C-NMR spectra and comparison to literature values. Reactions were monitored by thin layer chromatography (TLC), performed with silica plates (F254) and visualized with UV light a and/or iodine vapor.

### Structure elucidation of enzyme reaction products

EcTPS1 enzyme fractions (100 mL total in elution buffer [50 mM sodium phosphates, 5 mM MgCl<sub>2</sub>, 150 mM NaCl and 150 mM imidazole] obtained from a 30 L culture) were diluted with incubation buffer (400 mL containing 10% glycerol, 5 mM MgCl, 5 mM DTT and 20 mM sodium phosphate) to a final protein concentration of 0.8 μM, pH 6.8. Synthetic GGPP (120 mg) dissolved in water (50 mL) was slowly added dropwise at room temperature via syringe over 4 h to the enzyme solution with magnetic stirring. The reaction was then transferred to a shaking incubator at 25 °C and 180 RPM and left overnight. The reaction mixture was extracted with hexane (3x 200 mL). The combined organic layers were dried over Na<sub>2</sub>SO<sub>4</sub>, concentrated under reduced pressure on a rotovap and the crude mixture fractionated by column chromatography on silica gel using a 4:1 pentane/diethyl ether mixture to yield klysimplexin R (**4**, 2.9 mg) as a colorless oil (**Supplementary Figure 3**).

The molecular formula of **4** (C<sub>20</sub>H<sub>34</sub>O) was supported by preliminary analysis of the EIMS spectrum, with the fragment ion [M-H<sub>2</sub>O]<sup>+</sup> at *m/z* 272.3, consistent with the diterpene backbone, and the faint parent ion [M]<sup>+</sup> at *m/z* 290.3 indicating the presence of a diterpene alcohol

(**Supplementary Figure 2**). This was further supported by HR-ESIMS ( $m/z$  313.2535  $[M+Na]^+$ , calcd. for  $C_{20}H_{34}ONa$ , 313.2502). The  $^1H$  NMR spectrum (**Supplementary Note Figure 1**) of product **4** indicated the presence of two olefinic protons ( $\delta_H$  5.28 and 5.23). Two tertiary ( $\delta_C$  130.6 and 124.6) and two quaternary ( $\delta_C$  138.3 and 133.4) olefinic carbon signals were apparent in the  $^{13}C$  NMR spectrum (**Supplementary Note Figure 2**), indicating that compound **4** is a bicyclic compound with two double bonds incorporated into rings. Two methyl groups exhibited resonances that are typical of allylic methyl groups ( $\delta_H$  1.71 and 1.52; each 3H, s;  $\delta_C$  25.0 and 17.0 respectively). Two additional methyl groups appeared to be aliphatic ( $\delta_H$ , 0.97 and 0.77; each 3H, d,  $J=6.7$ ;  $\delta_C$  22.1 and 18.5, respectively). A final methyl group was detected which indicated the presence of a tertiary alcohol ( $\delta_H$ , 1.24; 3H, s;  $\delta_C$  26.1), which was corroborated by the presence of a single quaternary oxygenated carbon ( $\delta_C$  73.4). Sixteen of the remaining protons appeared in the region between  $\delta_H$  2.82 and 0.93 (**Supplementary Note Table 1**), and the final proton could not be detected and was presumed to be an exchangeable proton on an alcohol. The directly bonded carbon and hydrogen atoms were assigned based on the HSQC spectrum revealing three aliphatic methines, one allylic methine, three aliphatic methylenes and three allylic methylenes (**Supplementary Note Figure 3**). Using an extensive NMR spectroscopic analysis, including COSY and HMBC experiments (**Supplementary Note Table 1**), the structure of **4** was determined. The cross-peaks in the COSY spectrum between H<sub>3</sub>-19/H<sub>3</sub>-20 and H-18 as well as between H-18 and H-14 indicated the attachment of an isopropyl group to the ring system. Further cross-peaks in the COSY between H-1 and H-14 as well as H-10 eluded to the ring junction at C-1, while an elaborate array of HMBC correlations supported this branching point (cross-peaks between H-1 and C-2, C-3, C-9, C-10, C-11, C-13, C-14 and C-18). The remaining methylene carbons were assigned their respective positions by analysis of the COSY spectrum, with two separate spin-systems making up fragments of the carbon backbone. These fragments were connected by strategic use of the intense HMBC cross-peaks produced by the methyl resonances, with correlations between H<sub>3</sub>-15 and C-2, C-3 and C-4 along with correlations between H<sub>3</sub>-16 and C-6, C-7 and C-8 joining the two spin-systems and closing the macrocyclic ring. Finally, correlations between H<sub>3</sub>-17 and C-10, C-11 and C-12 closed the remaining gap and revealed the cyclohexanol motif. The resulting structure and data were identical to those for the previously described octocoral metabolite klysimplexin R (**4**)<sup>3</sup>.

The product of EcTPS6 was determined in a similar manner without optimization. Scale-up protein purification and enzyme reactions followed extraction with hexane provided a yellow oil. While analytical scale enzyme reactions showed only a single peak by GCMS, at preparative scale a second, earlier eluting peak appeared on the GCMS chromatogram. Each peak showed an ion at  $m/z$  272.3, which was assigned to the parent ion  $[M]^+$  with formula  $C_{20}H_{32}$  (**Supplementary Figure 2**). Purification of the crude enzyme product by silica gel column chromatography provided a clear oil eluting with pentane and showing a single spot by TLC, which upon further analysis by 1D  $^1H$ -NMR and 2D HSQC spectroscopy showed only the presence of olefinic methine, allylic methyl and allylic methylene groups. In the  $^1H$ -NMR spectrum collected in  $C_6D_6$  at 600 MHz, two sets of resolved singlets between  $\delta_H$  1.75 and 1.45 were present, each attributed to five separate methyl resonances. Integration of each resonance indicated two pentamethylated products in 3:2 ratio. MS and NMR (collected in  $CDCl_3$ ) data for the major isomer was consistent with a cembrene product reported from bacterial terpene cyclases (**Supplementary Note Figures 4 and 5, and Supplementary Note Table 2**)<sup>4</sup>. The other isomer was quite similar and is anticipated to be a double bond isomer, as has been

previously observed in cembrene chemistry. This was supported by the presence of one methyl group shifted downfield (Me-15;  $\delta_{\text{H}}$  1.58/ $\delta_{\text{C}}$  15.7 in **5a** vs.  $\delta_{\text{H}}$  1.72/ $\delta_{\text{C}}$  23.8 in **5b**) olefin (H-14/H-15;  $\delta_{\text{H}}$  5.04/ $\delta_{\text{C}}$  124.6 in **5a** vs.  $\delta_{\text{H}}$  5.18/ $\delta_{\text{C}}$  125.2 in **5b**), as seen in (3Z)-cembrene A<sup>5</sup>.

### Mechanistic study of eunicellane skeleton formation

The <sup>2</sup>H<sub>2</sub>-labelled isotopomer of 1,1-<sup>2</sup>H<sub>2</sub>-GGPP, (10 mg) was added to EcTPS1 in incubation buffer (20 mL). The mixtures were incubated for 16 h at 30 °C and extracted twice with pentane and the organic layer dried over sodium sulfate. The combined organic layers were analyzed by GCMS and NMR. The pattern of deuterium labelling was determined by analyzing the combined EI-MS and NMR data. The incorporation of two deuterium atoms overall was indicated by the observation of an EIMS fragment at 274.3 *m/z* ([M-H<sub>2</sub>O]<sup>+</sup>) (**Supplementary Note Figure 6**). The detection of an ion at 231.2 *m/z* ([M-H<sub>2</sub>O-C<sub>3</sub>H<sub>7</sub>]<sup>+</sup>) ruled out incorporation of deuterium at the isopropyl side chain (ie. C-18). In the <sup>1</sup>H-NMR spectrum of the deuterated product (**Supplementary Figure 2**), the H-1 resonance ( $\delta_{\text{H}}$  2.82 in unlabeled product) was clearly absent and the H-2 resonance appeared as a broad singlet ( $\delta_{\text{H}}$  5.29, d, *J*=9.0 Hz in unlabeled product), indicating retention of deuterium at C-1 during the cyclization cascade. A DPGFSE 1D TOCSY experiment with selective irradiation on the H<sub>3</sub>-19 resonance ( $\delta_{\text{H}}$  0.98) showed enhancement of the H-18 resonance ( $\delta_{\text{H}}$  1.88, septet, *J*=6.4 Hz in the labelled product), further confirming that deuterium was not present on the isopropyl side chain (**Supplementary Note Figure 7**). In this DPGFSE 1D TOCSY experiment, the H-14 resonance ( $\delta_{\text{H}}$  0.94) could not be observed. Taken together, these data indicate that deuterium is incorporated at C-1 as well as a second position on the cyclohexyl ring. Comparison of the <sup>1</sup>H-<sup>13</sup>C HSQC spectra of the EcTPS1 products derived from both 1,1-<sup>2</sup>H<sub>2</sub>-GGPP and GGPP with natural isotopic abundance revealed the disappearance of the C-1 and C-14 correlations, consistent with deuteration at these positions (**Supplementary Note Figure 3**). All other resonances were present in the 1,1-<sup>2</sup>H<sub>2</sub>-GGPP-derived product. Finally, the position of the deuterium at C-14 was confirmed by careful comparison of the <sup>1</sup>H-<sup>13</sup>C HMBC spectra for both 1,1-<sup>2</sup>H<sub>2</sub>-GGPP and GGPP derived products, revealing a chemical shift isotope effect at C-14 (**Supplementary Note Figure 8**). Accurate inverse measurements of the chemical shifts for the C-14, C-18 and C-19 resonances were determined from the 2D HMBC spectrum by extracting the 1D traces along F1 at 0.77 ppm (H<sub>3</sub>-20 resonances). While the <sup>13</sup>C chemical shifts for C-18 and C-19 were nearly identical ( $\delta_{\text{C}}$  26.500 and 22.252±0.059, respectively) when measured by this method, the C-14 resonances for the 1,1-<sup>2</sup>H<sub>2</sub>-GGPP and GGPP derived products were significantly different, with measured values of  $\delta_{\text{C}}$  45.253 and 45.720, respectively. This equates to a chemical shift isotope effect of  $\Delta\delta$  -467 ppb on the C-14 resonance of the 1,1-<sup>2</sup>H<sub>2</sub>-GGPP derived product, consistent with deuterium labelling at C-14. Thus, the incorporation of deuterium was determined to be at C-1 and C-14.



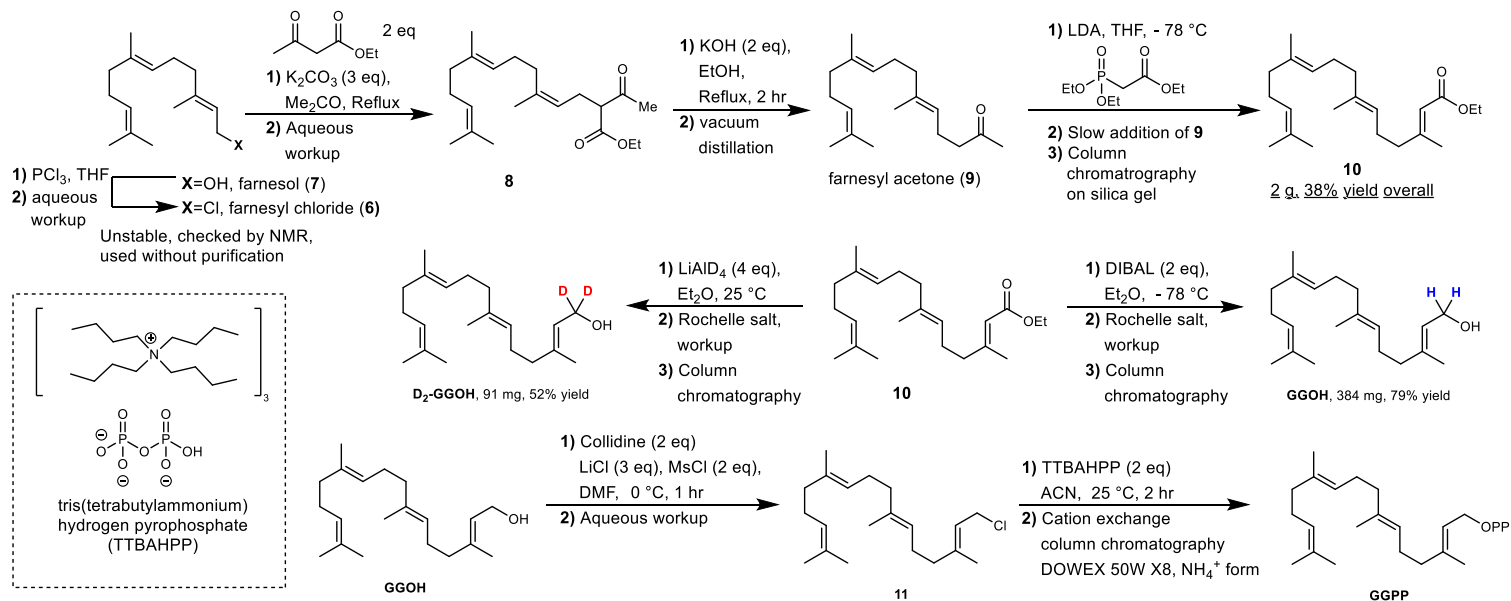

**Supplementary Note Scheme 1.** Synthesis of oligoprenyl pyrophosphate substrates starting from commercially available farnesol.

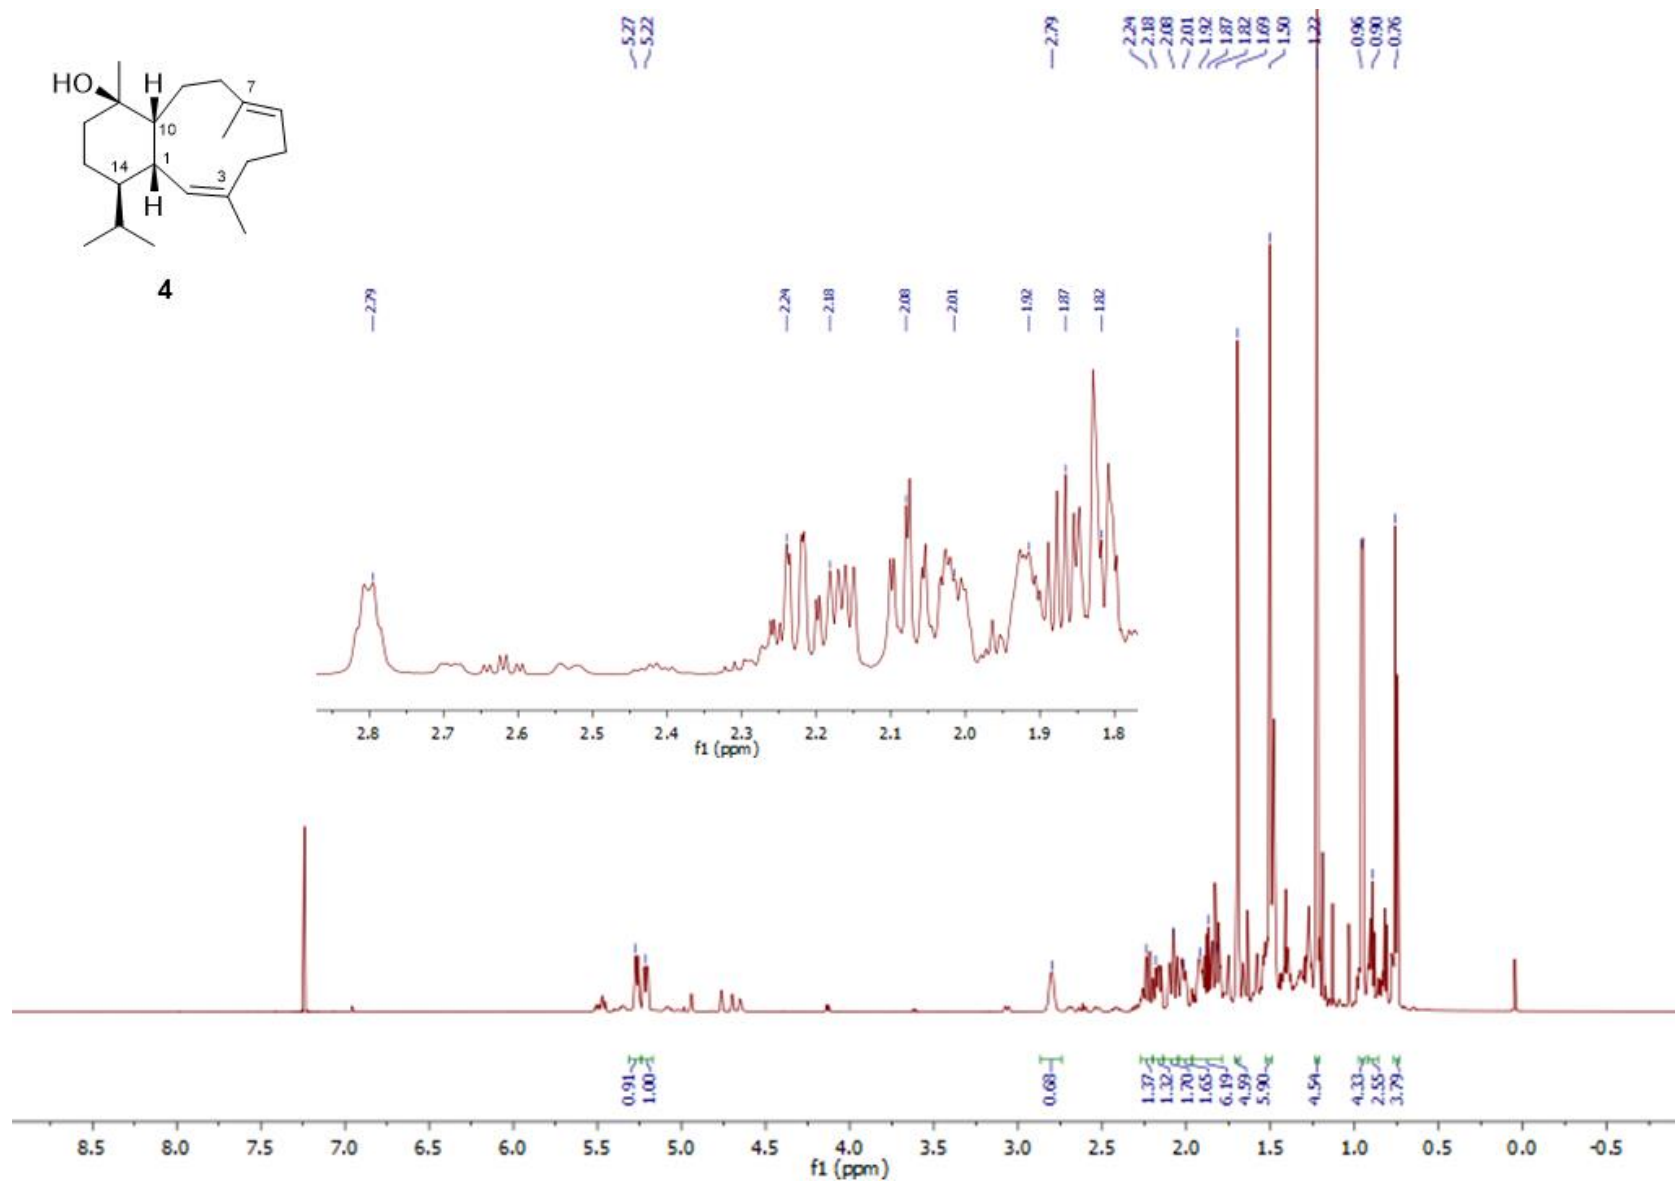

**Supplementary Note Figure 1.**  $^1\text{H}$  NMR spectrum of **4** in  $\text{CDCl}_3$  at 500 MHz.

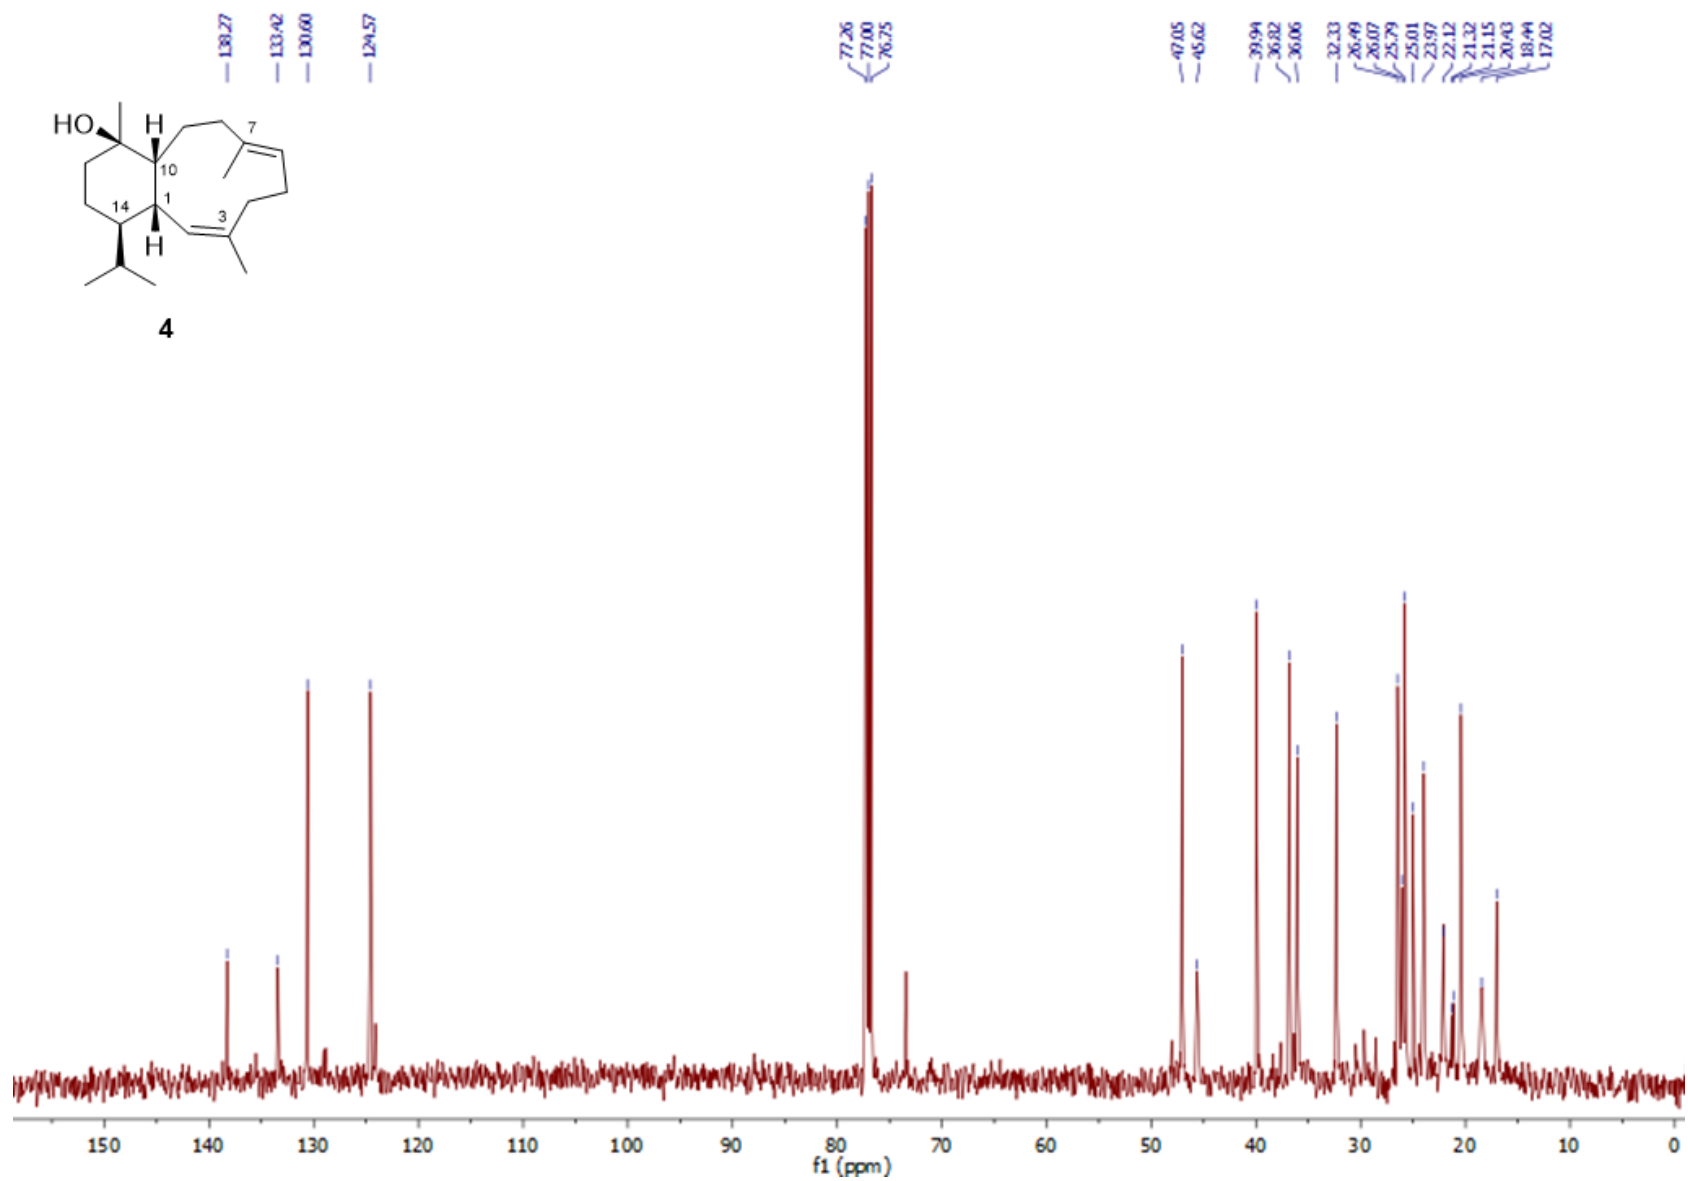

Supplementary Note Figure 2.  $^{13}\text{C}$  NMR spectrum of 4 in  $\text{CDCl}_3$  at 125 MHz.

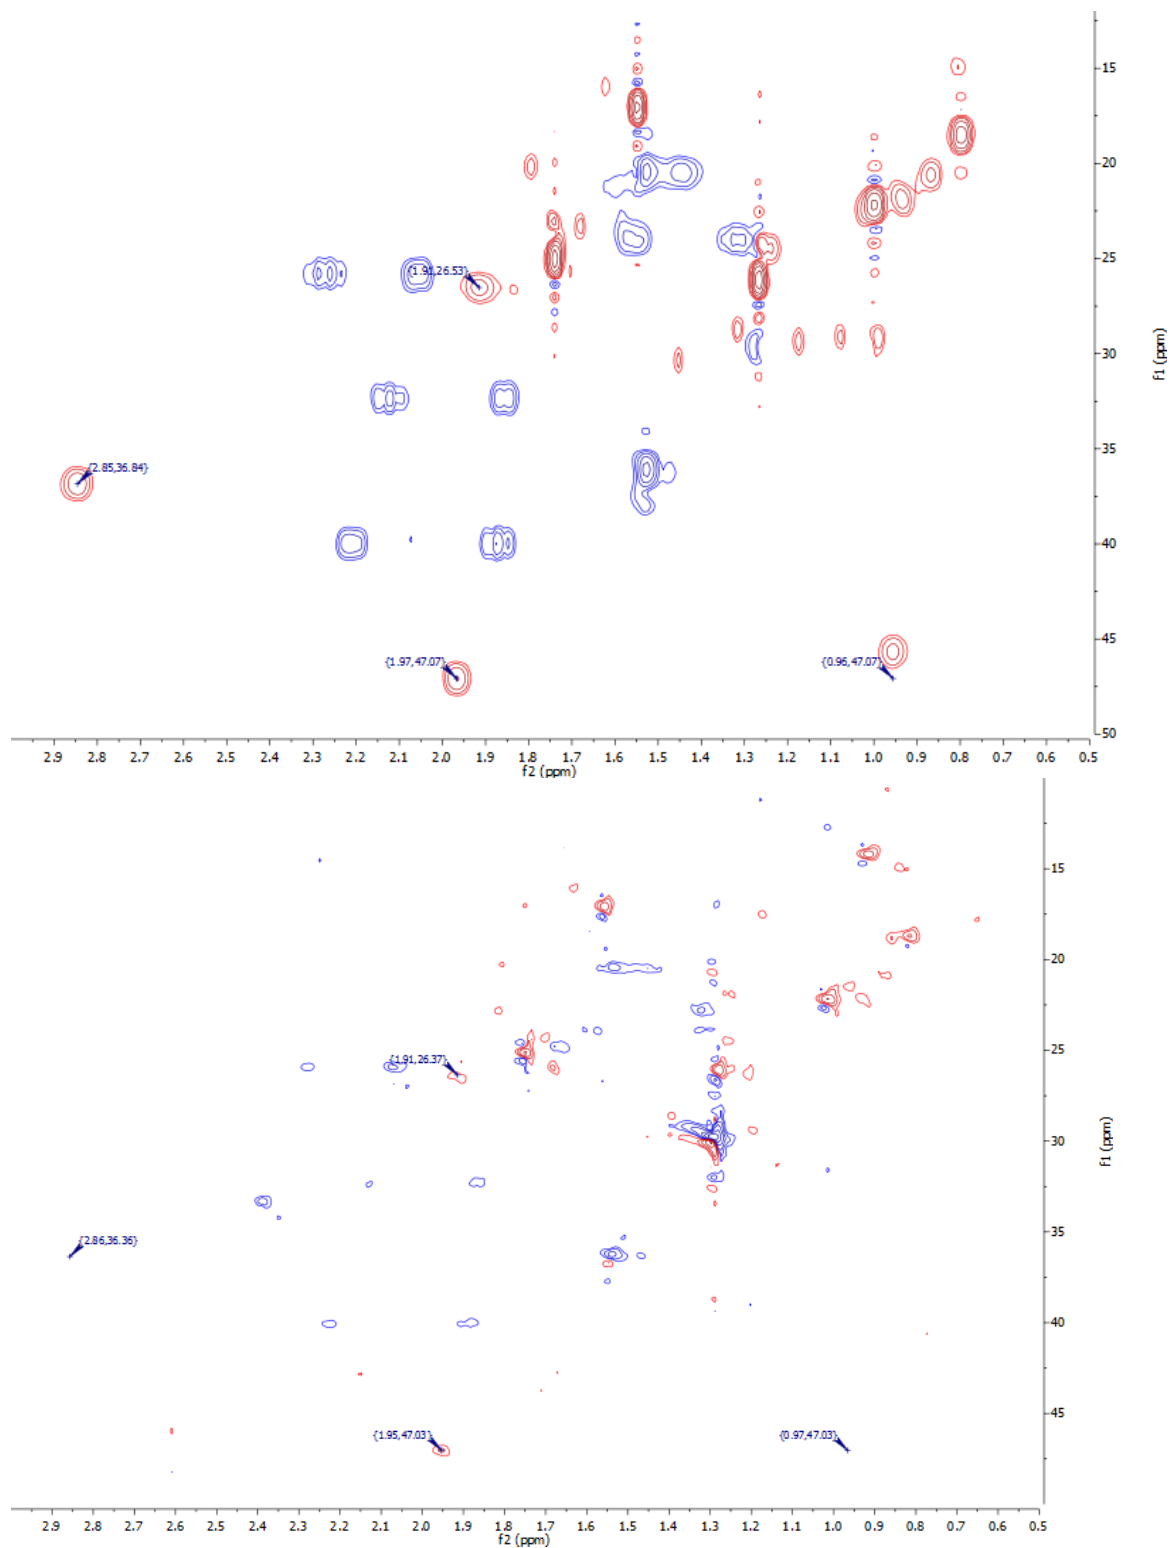

**Supplementary Note Figure 3.**  $^1\text{H}$ - $^{13}\text{C}$  HSQC NMR spectrum of **4** (top spectrum) and  $1,14\text{-}^2\text{H}_2\text{-4}$  (bottom spectrum) in  $\text{CDCl}_3$  at 500 MHz ( $^1\text{H}$  detection).

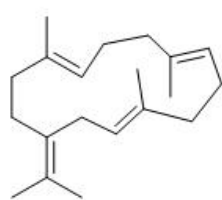

**5a**

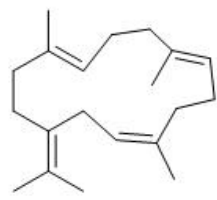

**5b**

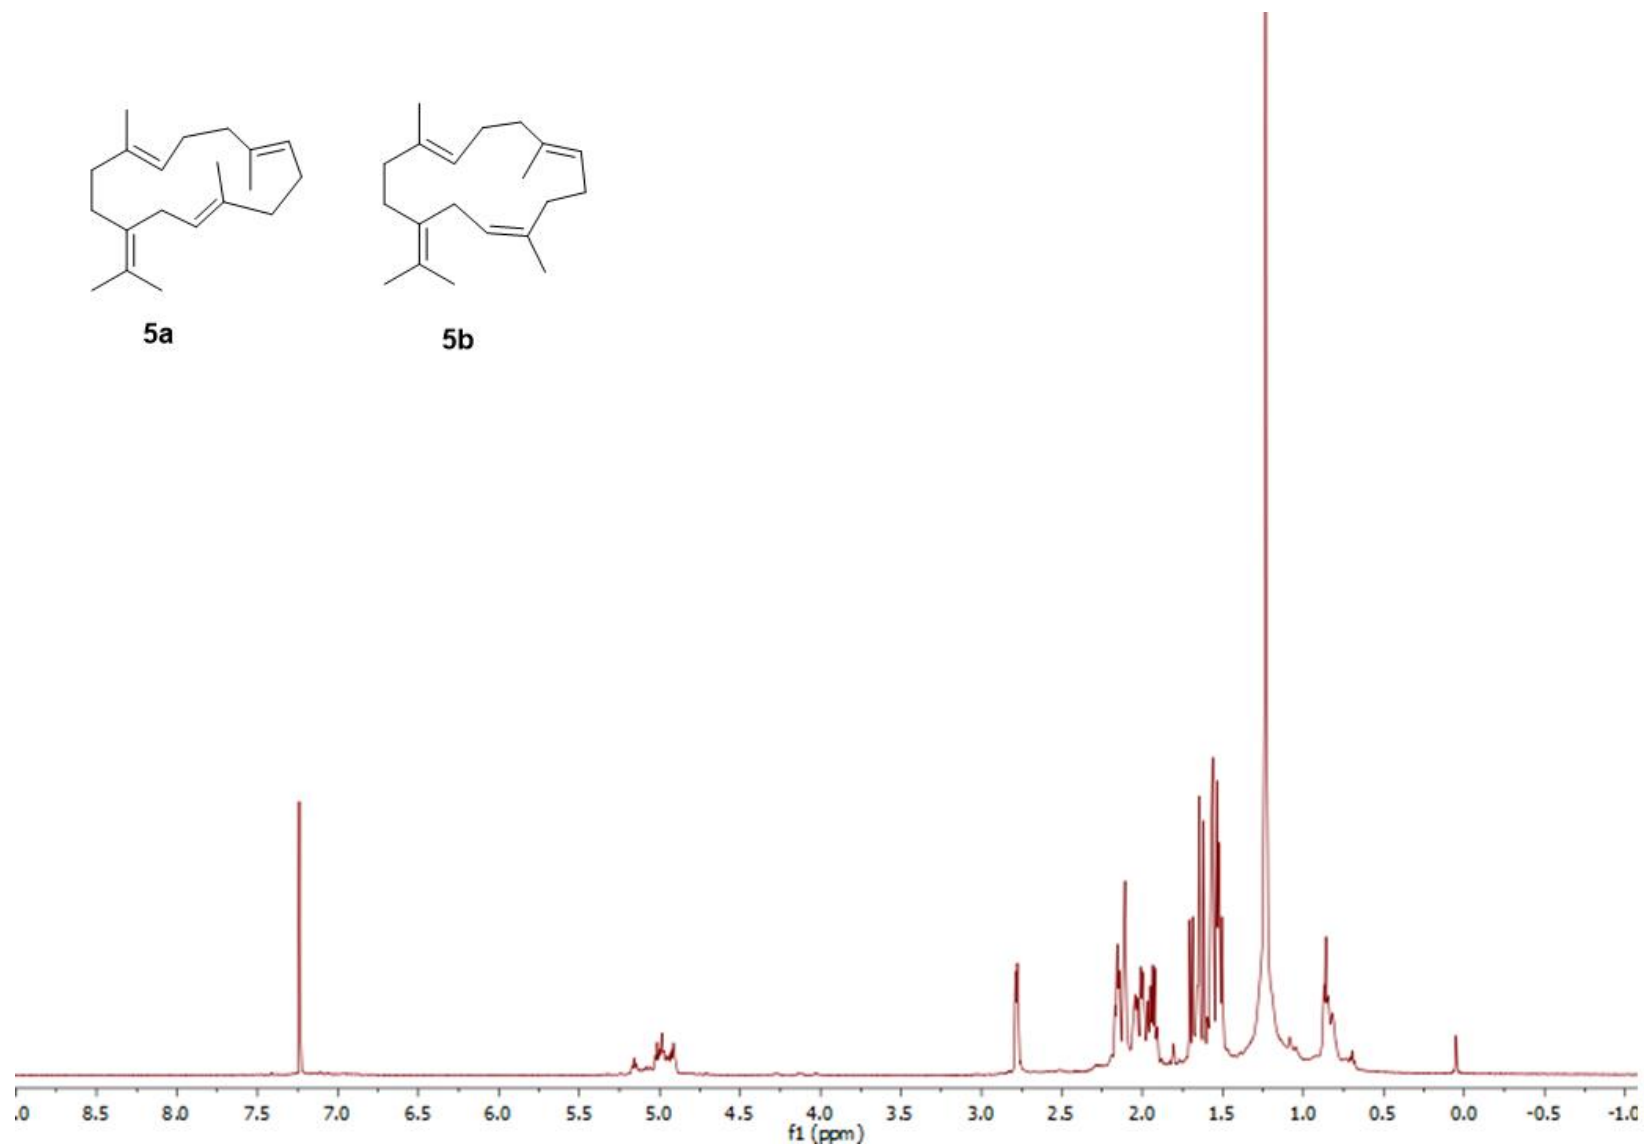

**Supplementary Note Figure 4.**  $^1\text{H}$  NMR spectrum of **5a** and **5b** in  $\text{CDCl}_3$  at 500 MHz.

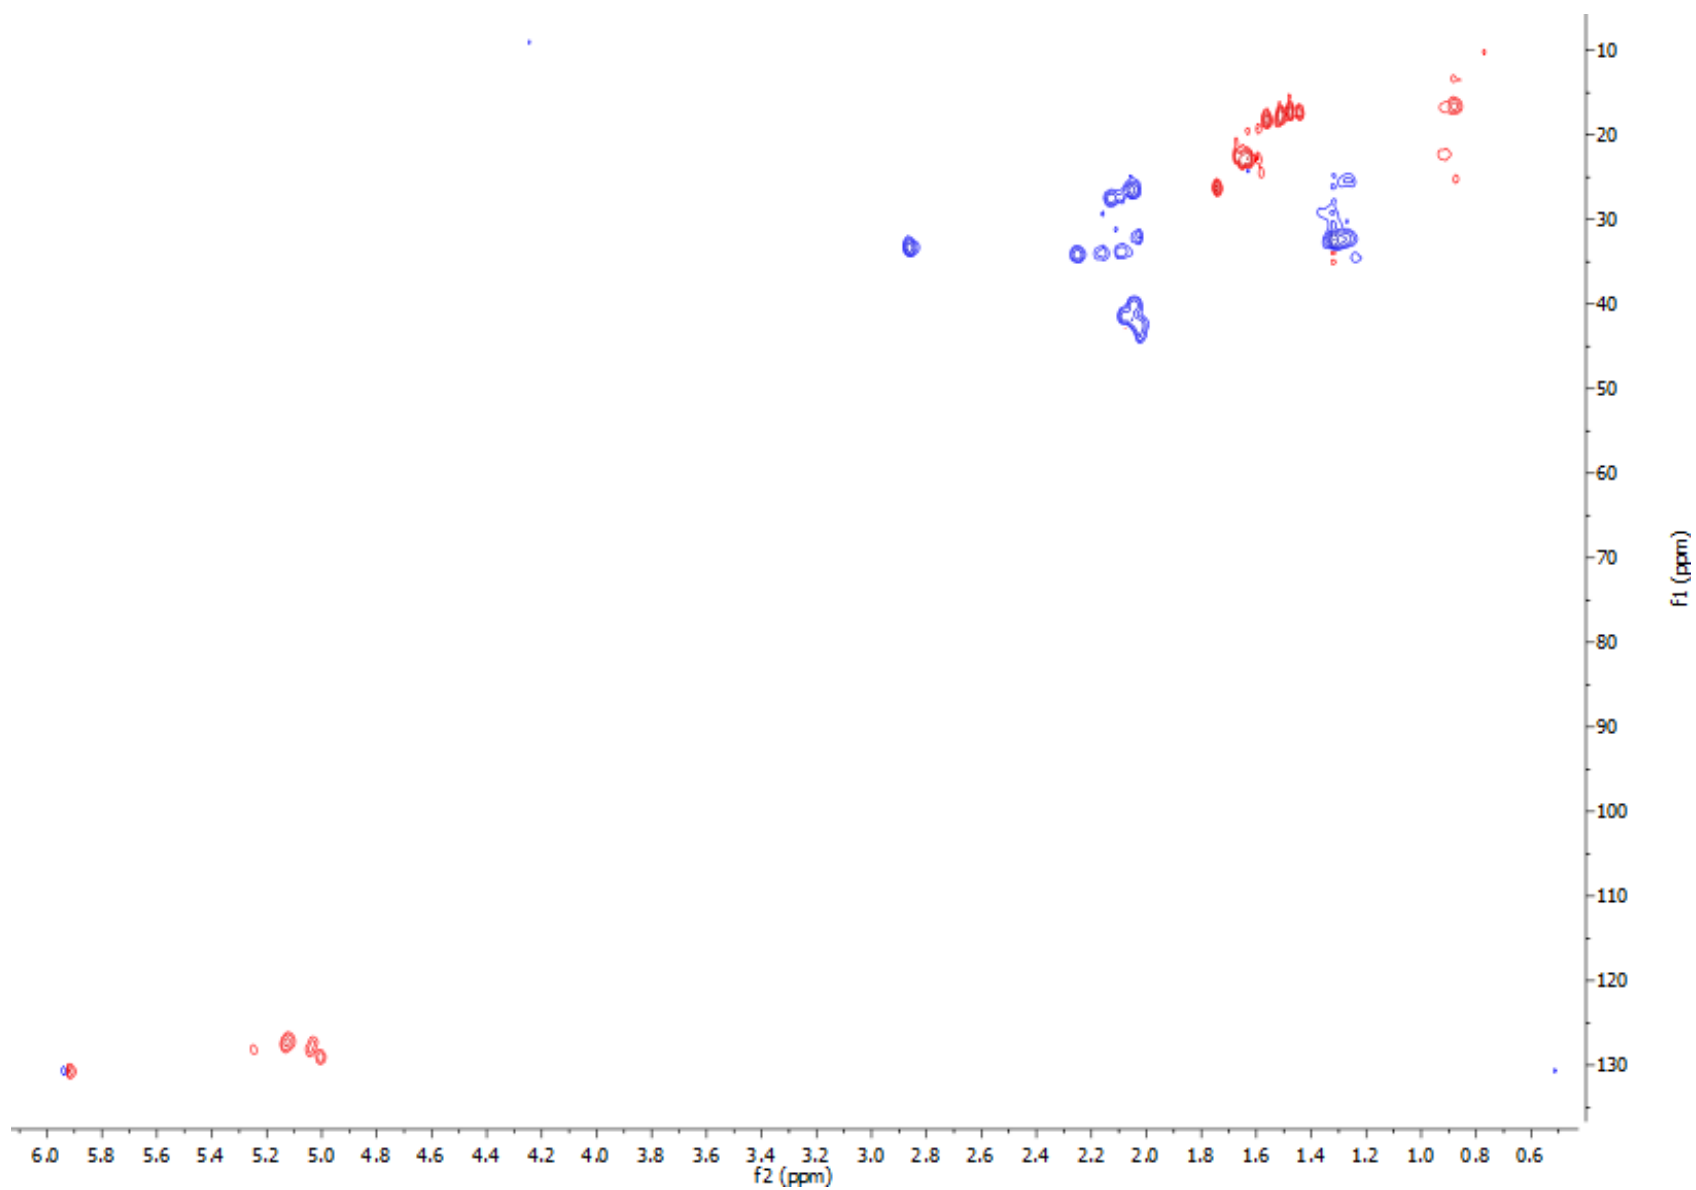

**Supplementary Note Figure 5.**  $^1\text{H}$ - $^{13}\text{C}$  HSQC NMR spectrum of **5** in  $\text{CDCl}_3$  at 500 MHz ( $^1\text{H}$  detection).

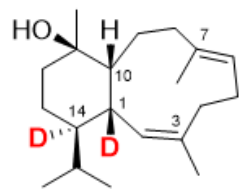

1,14-<sup>2</sup>H<sub>2</sub>-4

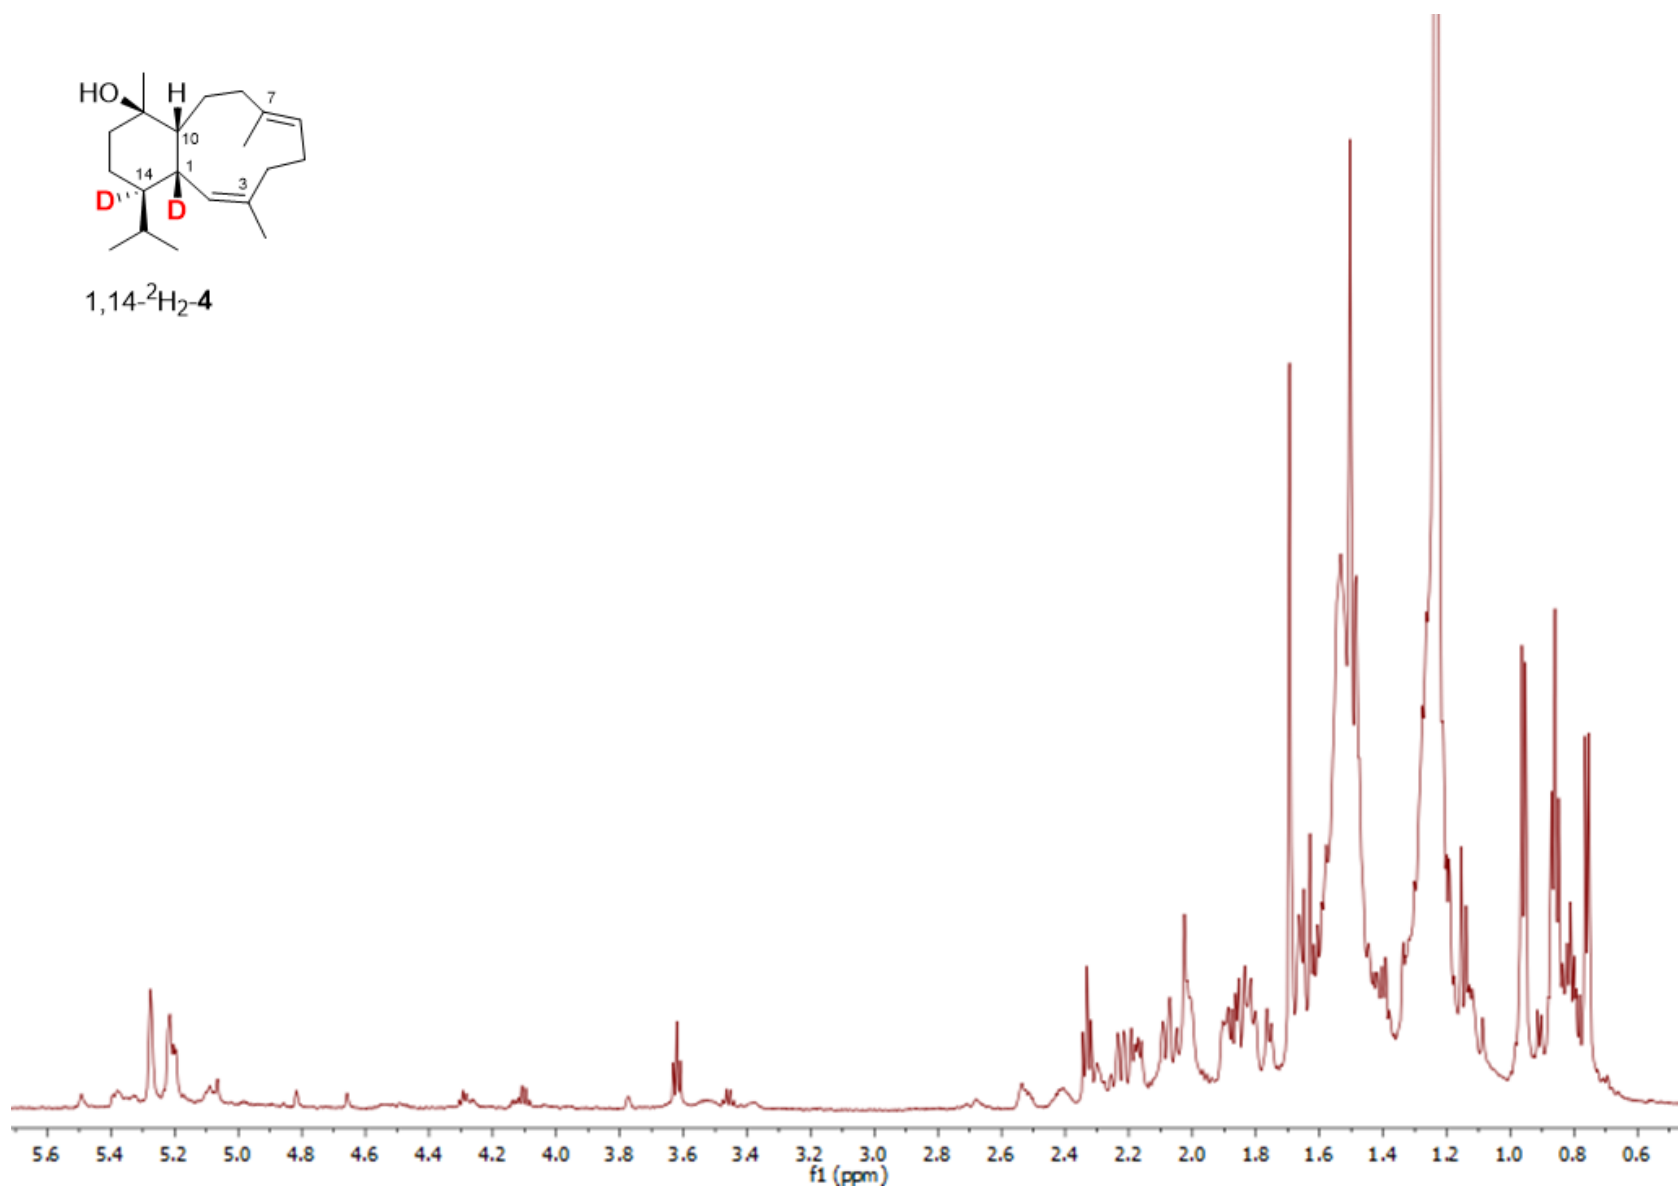

Supplementary Note Figure 6. <sup>1</sup>H NMR spectrum of 1,14-<sup>2</sup>H<sub>2</sub>-4 in CDCl<sub>3</sub> at 500 MHz.

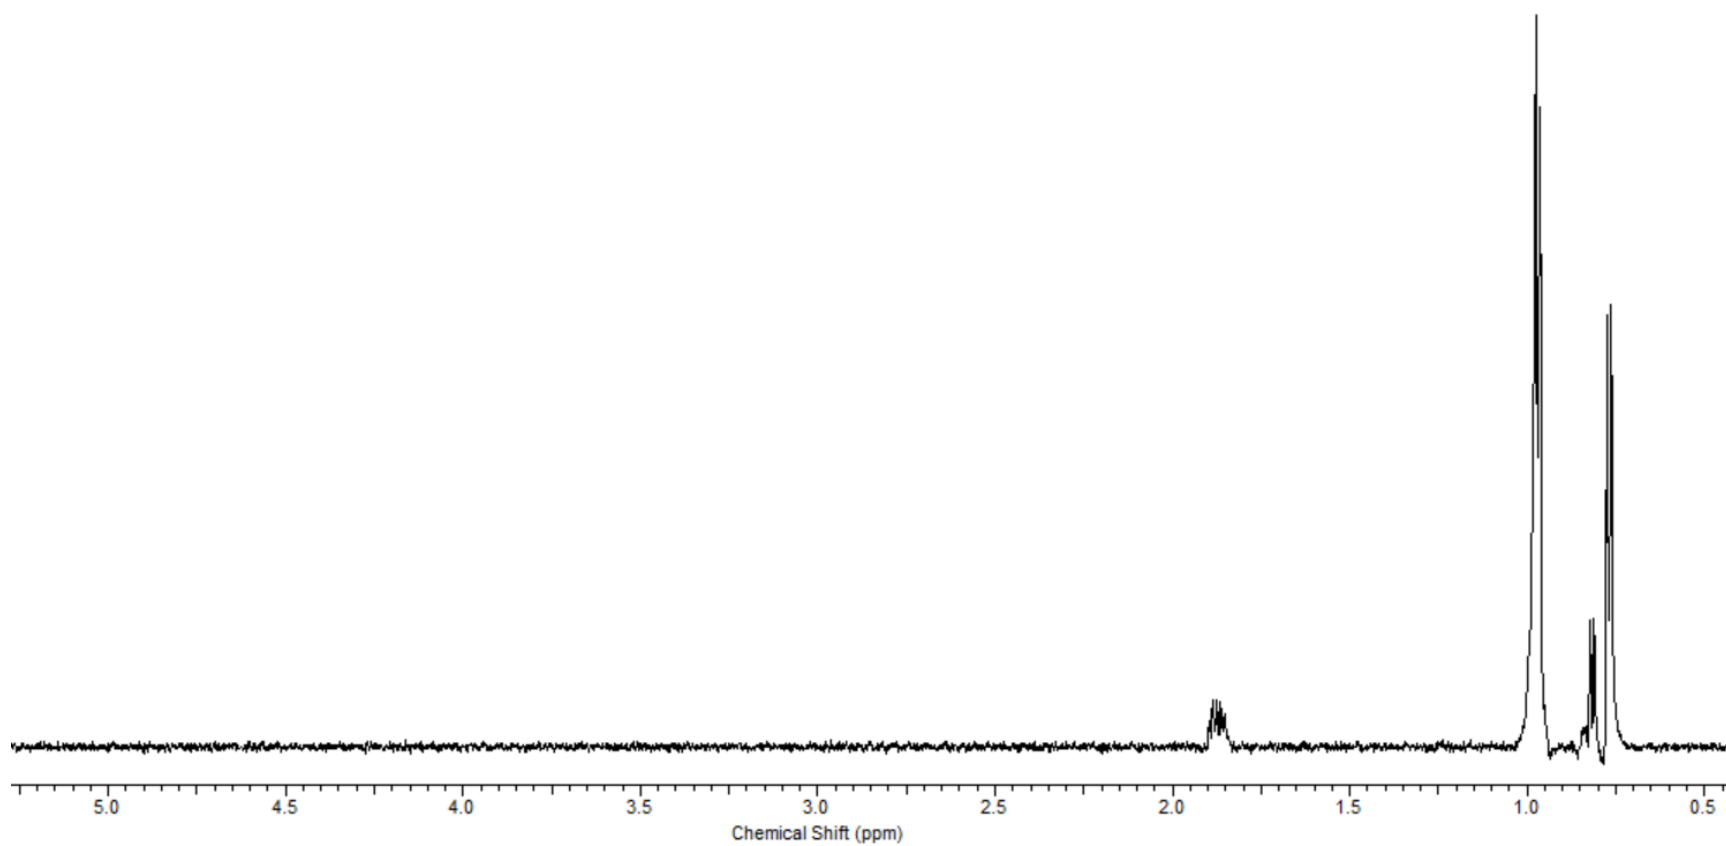

**Supplementary Note Figure 7.**  $^1\text{H}$  DPGSE 1D TOCSY NMR spectrum of 1,14- $^2\text{H}_2$ -4 with selective excitation at 0.98 ppm in  $\text{CDCl}_3$  at 500 MHz.



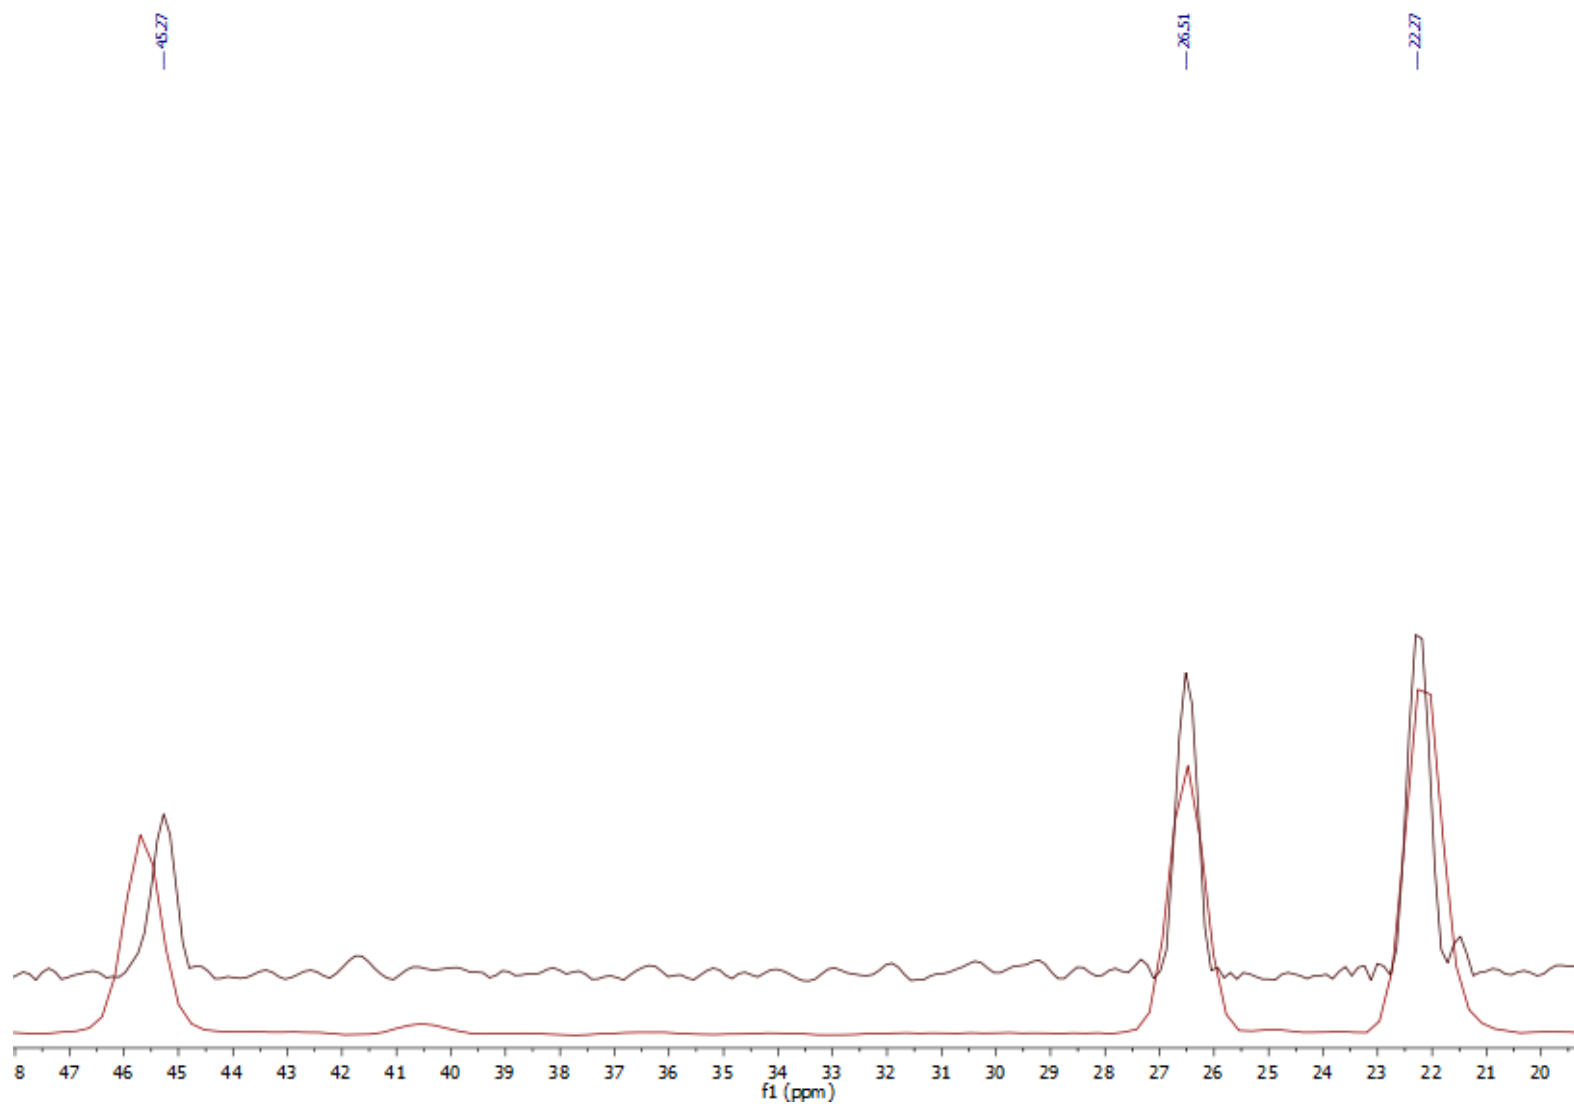

**Supplementary Note Figure 8.** 1D slices along F2 axis at 0.77 ppm from  $^1\text{H}$ - $^{13}\text{C}$  HMBC NMR spectrum of **4** (lower trace) and 1,14- $^2\text{H}_2$ -**4** (upper trace) in  $\text{CDCl}_3$  at 500 MHz ( $^1\text{H}$  detection).

**Supplementary Note Table 1.**  $^1\text{H}$  and  $^{13}\text{C}$ -NMR data for klysimplexin R (**4**) in  $\text{CDCl}_3$  at 500 MHz.

| Position | This work               |                                              | Chen et. al.        |                      |
|----------|-------------------------|----------------------------------------------|---------------------|----------------------|
|          | $\delta_{\text{C}}^a$   | $\delta_{\text{H}}^b$                        | $\delta_{\text{C}}$ | $\delta_{\text{H}}$  |
| 1        | 36.8 (CH)               | 2.82 (br q, 6.5)                             | 36.8                | 2.82 (m)             |
| 2        | 130.6 (CH)              | 5.28 (d, 8.8)                                | 130.6               | 5.29 (d, 9.0)        |
| 3        | 133.4 (C)               |                                              | 133.4               |                      |
| 4        | 32.3 (CH <sub>2</sub> ) | 2.10 (td, 12.2, 2.9)<br>1.83 (dt, 11.7, 3.9) | 32.3                | 2.10 (m)<br>1.83 (m) |
| 5        | 25.8 (CH <sub>2</sub> ) | 2.25 (qd, 12.0, 2.0)<br>2.03 (m)             | 25.8                | 2.25 (m)<br>2.03 (m) |
| 6        | 124.6 (CH)              | 5.23 (dd, 10.7, 4.9)                         | 124.6               | 5.24 (dd, 11.0, 4.5) |
| 7        | 138.3 (C)               |                                              | 138.3               |                      |
| 8        | 39.9 (CH <sub>2</sub> ) | 2.19 (br dd, 11.7, 5.9)<br>1.85 (br t, 13.5) | 39.9                | 2.19 (m)<br>1.85 (m) |
| 9        | 24.0 (CH <sub>2</sub> ) | 1.53 (m)<br>1.29 (m)                         | 24.0                | 1.57 (m)<br>1.29 (m) |
| 10       | 47.1 (CH)               | 1.94 (br q, 4.9)                             | 47.0                | 1.94 (m)             |
| 11       | 73.4 (C)                |                                              | 73.5                |                      |
| 12       | 36.1 (CH <sub>2</sub> ) | 1.50 (m)                                     | 36.1                | 1.48 (m)             |
| 13       | 20.4 (CH <sub>2</sub> ) | 1.50 (m)<br>1.42 (m)                         | 20.4                | 1.53 (m)<br>1.42 (m) |
| 14       | 45.6 (CH)               | 0.93 (td, 6.3, 2.4)                          | 45.6                | 0.94 (m)             |
| 15       | 25.0 (CH <sub>3</sub> ) | 1.71 (br s)                                  | 25.0                | 1.72 (s)             |
| 16       | 17.0 (CH <sub>3</sub> ) | 1.52 (br s)                                  | 17.0                | 1.53 (s)             |
| 17       | 26.1 (CH <sub>3</sub> ) | 1.24 (s)                                     | 26.1                | 1.25 (s)             |
| 18       | 26.5 (CH)               | 1.89 (m)                                     | 26.5                | 1.88 (m)             |
| 19       | 22.1 (CH <sub>3</sub> ) | 0.97 (d, 6.7)                                | 22.1                | 0.98 (d, 7.0)        |
| 20       | 18.4 (CH <sub>3</sub> ) | 0.77 (d, 6.7)                                | 18.5                | 0.77 (d, 7.0)        |

<sup>a</sup> Multiplicity determined by 2D HSQC. <sup>b</sup> Referenced to residual  $\text{CHCl}_3$  at 7.26 ppm.

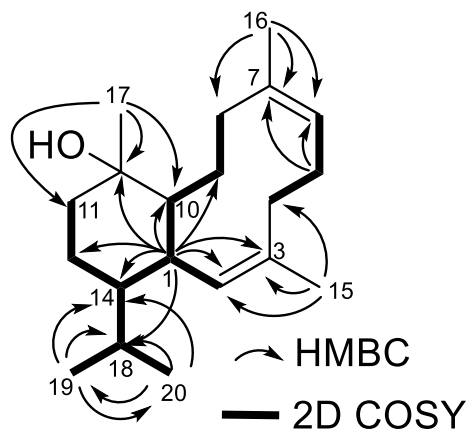

Selected 2D NMR correlations for **4**.

**Supplementary Note Table 2.** <sup>1</sup>H and <sup>13</sup>C-NMR data for **5a** and **5b** in CDCl<sub>3</sub> at 500 MHz.

| Position | <b>5a</b> Kuzuyama et. al. |               | <b>5a</b> (This work)   |                   | <b>5b</b> (This work)                   |                      |
|----------|----------------------------|---------------|-------------------------|-------------------|-----------------------------------------|----------------------|
|          | $\delta_C$                 | $\delta_H$    | $\delta_C^a$            | $\delta_H^b$      | $\delta_C^a$                            | $\delta_H^b$         |
| 2        | 39.0                       | 2.11 (t, 6.2) | 38.9 (CH <sub>2</sub> ) | 2.12 <sup>c</sup> | 31.0 (CH <sub>2</sub> ) <sup>c, d</sup> | 1.97 <sup>c, d</sup> |
| 3        | 24.9                       | 2.16 (m)      | 24.7 (CH <sub>2</sub> ) | 2.15 <sup>c</sup> | 29.1 (CH <sub>2</sub> ) <sup>c, d</sup> | 2.00 <sup>c, d</sup> |
| 4        | 126.3                      | 4.92 (t, 6.8) | 126.1 (CH)              | 4.94 (t, 7.0)     | 126.0 (CH)                              | 4.96                 |
| 6        | 40.0                       | 2.00 (t, 5.8) | 39.8 (CH <sub>2</sub> ) | 2.00 <sup>c</sup> | 39.8 (CH <sub>2</sub> )                 | 2.00 <sup>c, d</sup> |
| 7        | 23.8                       | 2.05 (m)      | 23.7 (CH <sub>2</sub> ) | 2.06 <sup>c</sup> | 31.0 (CH <sub>2</sub> ) <sup>c, d</sup> | 2.03 <sup>c, d</sup> |
| 8        | 124.1                      | 4.99 (t, 7.6) | 124.2 (CH)              | 5.01 (t, 5.0)     | 124.4 (CH)                              | 4.98                 |
| 10       | 37.4                       | 1.93 (t, 7.6) | 37.3 (CH <sub>2</sub> ) | 1.93 <sup>c</sup> | 41.0 (CH <sub>2</sub> ) <sup>c, d</sup> | 1.94 <sup>c, d</sup> |
| 11       | 31.4                       | 2.16 (t, 7.6) | 31.3 (CH <sub>2</sub> ) | 2.18 (t, 7.6)     | 30.8 (CH <sub>2</sub> ) <sup>c, d</sup> | 1.96 <sup>c, d</sup> |
| 13       | 30.5                       | 2.80 (d, 7.6) | 30.5 (CH <sub>2</sub> ) | 2.80 (d, 7.0)     | 30.9 (CH <sub>2</sub> )                 | 2.12                 |
| 14       | 124.8                      | 5.02 (t, 7.6) | 124.6 (CH)              | 5.04 (t, 7.0)     | 125.2 (CH)                              | 5.18 (t, 7.6)        |
| 15       | 15.9                       | 1.58 (s)      | 15.7 (CH <sub>3</sub> ) | 1.59 (s)          | 23.8 (CH <sub>3</sub> )                 | 1.72 (s)             |
| 16       | 15.0                       | 1.54 (s)      | 15.0 (CH <sub>3</sub> ) | 1.56 (s)          | 15.0 (CH <sub>3</sub> )                 | 1.52 (s)             |
| 17       | 15.3                       | 1.57 (s)      | 15.0(CH <sub>3</sub> )  | 1.58 (s)          | 15.0 (CH <sub>3</sub> )                 | 1.54 (s)             |
| 19       | 20.5                       | 1.63 (s)      | 20.2 (CH <sub>3</sub> ) | 1.64 (s)          | 19.7 (CH <sub>3</sub> )                 | 1.71 (s)             |
| 20       | 20.7                       | 1.65 (s)      | 20.4 (CH <sub>3</sub> ) | 1.67 (s)          | 19.7 (CH <sub>3</sub> )                 | 1.68 (s)             |

<sup>a</sup> Measured by 2D <sup>1</sup>H-<sup>13</sup>C HSQC. <sup>b</sup> Referenced to residual CHCl<sub>3</sub> at 7.26 ppm. <sup>c</sup> Multiplicity not reported due to signal overlap. <sup>d</sup> Position of assignments interchangeable.

## Supplementary Note 2: Computational chemistry methods and data

### Computational methods

The deuterium label resulted in a model that was tested using quantum mechanical calculations. Initial conformer distributions were determined by MMFF methods implemented in Spartan 14 v1.1.2 software to provide starting structures. All further DFT calculations were performed using the Gaussian16 program.<sup>6</sup> Structures were optimized by DFT using the B3LYP functional and 6-31g(d) basis set in the gas phase. Stationary points were determined to be minima (no imaginary frequencies) or transition states (one imaginary frequency) by frequency analysis. The identity of transition states was further supported by IRC calculations. The Gibb's free energy of stationary points was computed as the sum of electronic and thermal free energies using single point frequency calculations with the mPW1PW91 functional and 6-311+g(d,p) basis set. These energies were calculated in gas phase as well as in water using the CPCM implicit solvent model (**Supplementary Information Table 10**).

**Supplementary Note Table 1.** Atomic coordinates and energies for DFT calculated intermediate A<sup>+</sup>.

**Intermediate A<sup>+</sup>**

|   |             |             |             |
|---|-------------|-------------|-------------|
| C | -0.13515100 | 2.55735300  | 2.23455000  |
| C | 1.55613000  | -2.01281100 | 0.42943200  |
| C | 2.19785700  | 0.41747400  | 1.30542200  |
| C | 1.77682900  | -0.37495500 | 0.06210300  |
| C | 2.06258000  | 1.94723200  | 1.08416100  |
| C | 0.11073400  | 2.63387600  | -0.28489200 |
| C | 2.21725000  | -0.66547600 | -2.41559500 |
| C | 4.17151900  | -0.58864500 | -0.80186800 |
| C | -1.28072800 | 3.04659900  | -0.67752700 |
| C | 0.36752000  | -2.13963000 | 1.31085300  |
| C | -0.88741300 | -2.48679200 | 0.94225400  |
| H | 0.78815300  | 2.51706600  | -1.13589200 |
| H | 0.79324500  | -0.05961400 | -0.29271500 |
| C | -1.98435300 | 2.01245200  | -1.59687300 |
| C | -2.42668400 | 0.71605900  | -0.94107100 |
| C | -3.42902300 | 0.87358900  | 0.17780300  |
| C | -1.99871000 | -0.46873000 | -1.41420400 |
| C | -2.44365100 | -1.85836800 | -1.03264400 |
| H | 0.32350100  | 3.34078300  | 2.85254500  |
| H | -0.10725100 | 1.63593700  | 2.83173800  |
| H | -1.18380700 | 2.82348800  | 2.08996900  |
| H | 3.22415100  | 0.17034200  | 1.59959400  |
| H | 1.55701600  | 0.11776200  | 2.13941700  |
| H | 1.45188100  | -2.58234300 | -0.49487600 |
| H | 2.64482800  | 2.24340300  | 0.20135300  |
| H | 2.52717700  | 2.44727900  | 1.94350200  |
| H | 2.47378400  | -2.32243700 | 0.93577000  |
| H | 2.64171700  | -1.55835700 | -2.89430500 |
| H | 2.61248700  | 0.18407800  | -2.99788300 |
| H | 1.12913500  | -0.66443300 | -2.49481400 |
| H | 4.42543700  | -1.10418200 | 0.13046000  |
| H | 4.53958100  | 0.44384700  | -0.67670300 |
| H | 4.70936100  | -1.03619800 | -1.64054800 |
| H | -1.21852800 | 3.98988500  | -1.23776600 |
| H | -1.90281400 | 3.25691600  | 0.19694800  |
| H | 0.55261800  | -1.94162900 | 2.36424600  |
| H | -1.33127000 | 1.79171000  | -2.45118400 |
| H | -2.87786100 | 2.49957100  | -2.01366500 |
| H | -4.25432900 | 1.52599400  | -0.13505500 |
| H | -3.86373800 | -0.07323300 | 0.50492700  |
| H | -2.97394000 | 1.34729600  | 1.05684800  |
| H | -1.30195200 | -0.44248800 | -2.25689700 |
| H | -2.82717400 | -2.35039100 | -1.93701000 |
| H | -3.28126300 | -1.83378700 | -0.33107700 |
| C | 0.62045700  | 2.40371000  | 0.93639300  |
| C | -1.32545500 | -2.78457500 | -0.47276600 |
| H | -1.71476000 | -3.81251600 | -0.48487100 |
| H | -0.47813800 | -2.76911300 | -1.16720700 |
| C | -1.94133900 | -2.65667800 | 2.00663600  |
| H | -2.41369300 | -3.64418400 | 1.93107400  |
| H | -1.52968100 | -2.54813000 | 3.01343700  |
| H | -2.74333100 | -1.91700300 | 1.88970900  |
| C | 2.70654000  | -0.51757200 | -1.02534600 |

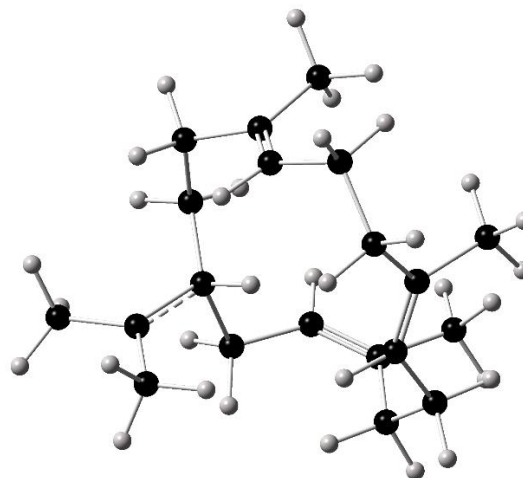

Calculation Type = FREQ  
 Calculation Method = RmPW1PW91  
 Basis Set = 6-311+G(d,p)  
 Charge = 1  
 Spin = Singlet  
 Solvation = scrf=(cpcm,solvent=water)  
 E(RmPW1PW91) = -781.77268 Hartree  
 RMS Gradient Norm = 0.002138283 Hartree/Bohr  
 Imaginary Freq = 0  
 Dipole Moment = 10.549386 Debye  
 Polarizability (?) = 336.62333 a.u.  
 Point Group = C1  
 Job cpu time: 0 days 19 hours 34 minutes 29.0 seconds.

**Thermo Tab Data Section:**  
 Imaginary Freq = 0  
 Temperature = 298.15 Kelvin  
 Pressure = 1 atm  
 Frequencies scaled by = 1  
 Electronic Energy (EE) = -781.77268 Hartree  
 Zero-point Energy Correction = 0.482156 Hartree  
 Thermal Correction to Energy = 0.504822 Hartree  
 Thermal Correction to Enthalpy = 0.505766 Hartree  
 Thermal Correction to Free Energy = 0.43344 Hartree  
 EE + Zero-point Energy = -781.29052 Hartree  
 EE + Thermal Energy Correction = -781.26786 Hartree  
 EE + Thermal Enthalpy Correction = -781.26691 Hartree  
 EE + Thermal Free Energy Correction = -781.33924 Hartree  
 E (Thermal) = 316.781 kcal/mol  
 Heat Capacity (Cv) = 89.916 cal/mol-kelvin  
 Entropy (S) = 152.224 cal/mol-kelvin

**Supplementary Note Table 2.** Atomic coordinates and energies for DFT calculated transition state **TS<sub>AB</sub>**.

**Transition state TS<sub>AB</sub>**

|   |             |             |             |
|---|-------------|-------------|-------------|
| C | 0.67188200  | 2.91928000  | 1.38367600  |
| C | 0.51631100  | -0.26791500 | 0.23205700  |
| C | 2.75876600  | 0.31825500  | 1.24015200  |
| C | 1.97654200  | -0.70142400 | 0.40211300  |
| C | 2.73057200  | 1.69791000  | 0.51802600  |
| C | 0.57444000  | 1.56278100  | -0.75440300 |
| C | 2.67349800  | -1.15276600 | -0.91955500 |
| C | 4.15071500  | -1.51935000 | -0.68960000 |
| C | 1.94986700  | -2.35132900 | -1.56016000 |
| C | -0.73438500 | 2.19199600  | -1.20588600 |
| C | -0.37857800 | -0.26208500 | 1.39500000  |
| C | -1.41074100 | -1.12572900 | 1.58693800  |
| C | -2.19891900 | -1.06336200 | 2.86932700  |
| C | -1.80863700 | -2.24775300 | 0.64549000  |
| H | 1.17068700  | 1.15554900  | -1.57006200 |
| H | 0.04231700  | -0.69313100 | -0.64692500 |
| C | -1.68118100 | 1.37314400  | -2.11965600 |
| C | -2.58733400 | 0.46098100  | -1.32107200 |
| C | -3.65113400 | 1.15159600  | -0.49910900 |
| C | -2.38793900 | -0.86476300 | -1.34290900 |
| C | -2.92567700 | -1.88180200 | -0.38214000 |
| H | 1.21074500  | 2.84873900  | 2.33313800  |
| H | 0.73478700  | 3.96929200  | 1.05728400  |
| H | -0.38644000 | 2.70077600  | 1.54391100  |
| H | 3.79325500  | 0.01044700  | 1.40356500  |
| H | 2.30222400  | 0.41687000  | 2.23173500  |
| H | 1.88903500  | -1.61001800 | 1.02138500  |
| H | 3.25573600  | 1.62021500  | -0.43823200 |
| H | 3.24089700  | 2.44440700  | 1.13481200  |
| H | 2.65121500  | -0.32479100 | -1.64271600 |
| H | 4.58086000  | -1.93089200 | -1.60789000 |
| H | 4.25368600  | -2.28211300 | 0.09230200  |
| H | 4.76439500  | -0.65859400 | -0.40642100 |
| H | 0.90927200  | -2.13938300 | -1.82999000 |
| H | 1.95305100  | -3.21651900 | -0.88535000 |
| H | 2.45924500  | -2.65149500 | -2.48114600 |
| H | -0.40993600 | 3.08104700  | -1.76827100 |
| H | -1.29664200 | 2.57684500  | -0.35201000 |
| H | -0.12780300 | 0.39420100  | 2.22557600  |
| H | -2.04432400 | -1.97310500 | 3.46393300  |
| H | -3.27460000 | -1.01693800 | 2.65424600  |
| H | -1.93428800 | -0.19995100 | 3.48575600  |
| H | -0.94021400 | -2.62014700 | 0.09172000  |
| H | -2.16415000 | -3.08785900 | 1.25420900  |
| H | -1.09579400 | 0.80087300  | -2.85009400 |
| H | -2.27681200 | 2.09564100  | -2.69226800 |
| H | -4.35567300 | 0.45143600  | -0.04638200 |
| H | -3.23066900 | 1.76149000  | 0.31135100  |
| H | -4.23026700 | 1.83377500  | -1.13470800 |
| H | -1.63941600 | -1.25347500 | -2.03788600 |
| H | -3.20998300 | -2.80593300 | -0.89902800 |
| H | -3.81452600 | -1.52643200 | 0.14711900  |
| C | 1.29862200  | 2.06719800  | 0.32793400  |

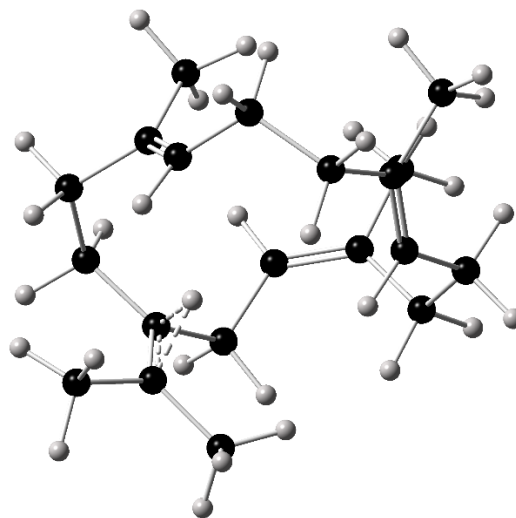

Calculation Type = FREQ  
 Calculation Method = RmPW1PW91  
 Basis Set = 6-311+G(d,p)  
 Charge = 1  
 Spin = Singlet  
 Solvation = scrf=(cpcm,solvent=water)  
 E(RmPW1PW91) = -781.75907 Hartree  
 RMS Gradient Norm = 0.001495216 Hartree/Bohr  
 Imaginary Freq = 1  
 Dipole Moment = 9.1505554 Debye  
 Polarizability (?) = 313.756 a.u.  
 Point Group = C1  
 Job cpu time: 0 days 20 hours 0 minutes 48.5 seconds.

**Thermo Tab Data Section:**

Imaginary Freq = 1  
 Temperature = 298.15 Kelvin  
 Pressure = 1 atm  
 Frequencies scaled by = 1  
 Electronic Energy (EE) = -781.75907 Hartree  
 Zero-point Energy Correction = 0.480398 Hartree  
 Thermal Correction to Energy = 0.502321 Hartree  
 Thermal Correction to Enthalpy = 0.503265 Hartree  
 Thermal Correction to Free Energy = 0.432614 Hartree  
 EE + Zero-point Energy = -781.27868 Hartree  
 EE + Thermal Energy Correction = -781.25675 Hartree  
 EE + Thermal Enthalpy Correction = -781.25581 Hartree  
 EE + Thermal Free Energy Correction = -781.32646 Hartree  
 E (Thermal) = 315.211 kcal/mol  
 Heat Capacity (Cv) = 87.933 cal/mol-kelvin  
 Entropy (S) = 148.699 cal/mol-kelvin

**Supplementary Note Table 3.** Atomic coordinates and energies for DFT calculated intermediate **B<sup>+</sup>**.

**Intermediate B<sup>+</sup>**

|   |             |             |             |
|---|-------------|-------------|-------------|
| C | -0.99541800 | 3.29345100  | 1.36351600  |
| C | 2.08543600  | -1.02940400 | -1.05843200 |
| C | 1.08851700  | 1.07399300  | 0.07417700  |
| C | 2.32841400  | 0.46055500  | -0.63620100 |
| C | 0.57071100  | 2.42085500  | -0.48073000 |
| C | -1.85588400 | 2.17049600  | -0.74127700 |
| C | 3.64799100  | 0.77657200  | -0.08311700 |
| C | 3.85798900  | 1.93289700  | 0.80495800  |
| C | 4.83798200  | -0.04109500 | -0.41786800 |
| C | -3.31339600 | 2.03105100  | -0.41282700 |
| C | 1.74837100  | -1.87819800 | 0.13914800  |
| C | 0.69439800  | -2.69698100 | 0.31442600  |
| H | -1.58805700 | 1.75808500  | -1.71731200 |
| H | 1.26680500  | -1.02288300 | -1.78142000 |
| C | -3.81847900 | 0.60846200  | -0.77368000 |
| C | -3.12936300 | -0.54521100 | -0.06227200 |
| C | -3.36316900 | -0.61609800 | 1.42727800  |
| C | -2.43038800 | -1.45090900 | -0.77027800 |
| C | -1.84556800 | -2.76767500 | -0.32160700 |
| H | -0.62071700 | 4.32598800  | 1.33523800  |
| H | -2.03290300 | 3.33333200  | 1.70175500  |
| H | -0.41358300 | 2.77010800  | 2.13535000  |
| H | 1.25772900  | 1.13320400  | 1.15542300  |
| H | 0.28325900  | 0.34527900  | -0.04964100 |
| H | 2.96242700  | -1.41580000 | -1.59251300 |
| H | 0.57859000  | 2.37460500  | -1.57845800 |
| H | 1.22713100  | 3.25591400  | -0.19683300 |
| H | 2.46340400  | 1.01769500  | -1.60272500 |
| H | 4.79267900  | 2.45443800  | 0.56766600  |
| H | 4.01846100  | 1.50852200  | 1.81553600  |
| H | 3.01791500  | 2.62274300  | 0.85953300  |
| H | 4.91687400  | -0.18469200 | -1.50389700 |
| H | 4.70188400  | -1.05376500 | -0.00886400 |
| H | 5.76779000  | 0.38166700  | -0.03495100 |
| H | -3.90559000 | 2.74949700  | -0.99782100 |
| H | -3.51282000 | 2.25448400  | 0.64006400  |
| H | 2.46327600  | -1.81002800 | 0.96321900  |
| H | -3.72321900 | 0.47269400  | -1.85804900 |
| H | -4.89437000 | 0.56687300  | -0.55142100 |
| H | -4.43552000 | -0.70588800 | 1.64680500  |
| H | -2.85564900 | -1.45762400 | 1.90450300  |
| H | -3.02099900 | 0.30111900  | 1.92393700  |
| H | -2.35824000 | -1.28720600 | -1.84817600 |
| H | -2.43892500 | -3.55860100 | -0.80160600 |
| H | -1.97446700 | -2.91974500 | 0.75286700  |
| C | -0.84979500 | 2.64355700  | 0.01050200  |
| C | -0.35983600 | -3.01085800 | -0.73002200 |
| H | -0.24588500 | -4.08104000 | -0.95467700 |
| H | -0.15959700 | -2.48997200 | -1.67218500 |
| C | 0.57685400  | -3.47331000 | 1.60659300  |
| H | 0.50383100  | -4.55029700 | 1.40905300  |
| H | 1.43419100  | -3.30523700 | 2.26486900  |
| H | -0.32791200 | -3.19635400 | 2.16101400  |

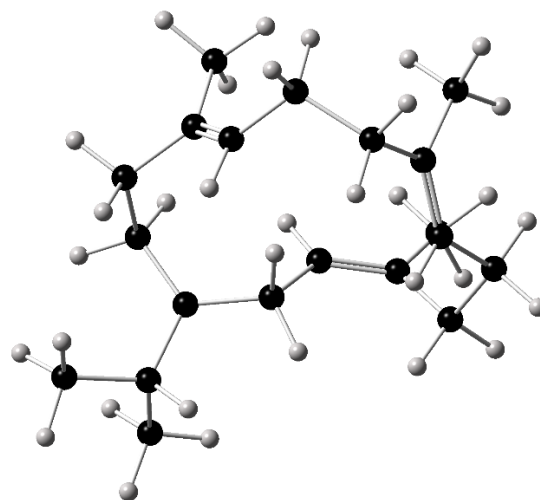

Calculation Type = FREQ  
 Calculation Method = RmPW1PW91  
 Basis Set = 6-311+G(d,p)  
 Charge = 1  
 Spin = Singlet  
 Solvation = scrf=(cpcm,solvent=water)  
 E(RmPW1PW91) = -781.77361 Hartree  
 RMS Gradient Norm = 0.001455913 Hartree/Bohr  
 Imaginary Freq = 0  
 Dipole Moment = 7.5293758 Debye  
 Polarizability (?) = 338.54433 a.u.  
 Point Group = C1  
 Job cpu time: 0 days 19 hours 2 minutes 1.8 seconds.

**Thermo Tab Data Section:**  
 Imaginary Freq = 0  
 Temperature = 298.15 Kelvin  
 Pressure = 1 atm  
 Frequencies scaled by = 1  
 Electronic Energy (EE) = -781.77361 Hartree  
 Zero-point Energy Correction = 0.482208 Hartree  
 Thermal Correction to Energy = 0.504707 Hartree  
 Thermal Correction to Enthalpy = 0.505651 Hartree  
 Thermal Correction to Free Energy = 0.433529 Hartree  
 EE + Zero-point Energy = -781.29141 Hartree  
 EE + Thermal Energy Correction = -781.26891 Hartree  
 EE + Thermal Enthalpy Correction = -781.26796 Hartree  
 EE + Thermal Free Energy Correction = -781.34008 Hartree  
 E (Thermal) = 316.708 kcal/mol  
 Heat Capacity (Cv) = 89.54 cal/mol-kelvin  
 Entropy (S) = 151.794 cal/mol-kelvin

**Supplementary Note Table 4.** Atomic coordinates and energies for DFT calculated transition state **TS<sub>BC</sub>**.

**Transition state TS<sub>BC</sub>**

|   |             |             |             |
|---|-------------|-------------|-------------|
| C | 0.08154500  | 1.46096200  | 2.43046100  |
| C | 1.11407400  | -2.27716600 | 0.31537800  |
| C | 2.60405400  | -0.42576800 | 1.34984600  |
| C | 2.01476100  | -1.06454800 | 0.09550800  |
| C | 2.44836400  | 1.11960900  | 1.50400200  |
| C | 0.76983600  | 2.35563700  | 0.16546200  |
| C | 2.42735400  | -0.69578600 | -1.20225100 |
| C | 3.55679000  | 0.26817500  | -1.46710000 |
| C | 1.87755800  | -1.34448000 | -2.45316200 |
| C | -0.48900100 | 3.09324300  | -0.20587300 |
| C | -0.09492900 | -2.07508500 | 1.19977400  |
| C | -1.38644700 | -2.12823000 | 0.83064200  |
| H | 1.58291100  | 2.48337100  | -0.55436900 |
| H | 0.84100600  | -2.73679000 | -0.63219400 |
| C | -1.29838700 | 2.45526600  | -1.37107800 |
| C | -2.18411900 | 1.28960200  | -0.97466100 |
| C | -3.39041900 | 1.66396600  | -0.14519100 |
| C | -1.91845600 | 0.04671200  | -1.41076100 |
| C | -2.70741400 | -1.21738500 | -1.19420500 |
| H | 0.41265200  | 2.02368300  | 3.31371400  |
| H | -0.93295500 | 1.78042900  | 2.18775400  |
| H | 0.02962500  | 0.40767900  | 2.72799900  |
| H | 3.67227200  | -0.67707000 | 1.38720900  |
| H | 2.14355100  | -0.91711900 | 2.20892300  |
| H | 1.79615900  | -2.99234000 | 0.80594700  |
| H | 3.14264300  | 1.63403900  | 0.83537300  |
| H | 2.78263300  | 1.35159700  | 2.52280200  |
| H | 1.38268900  | -0.09020500 | -0.53777700 |
| H | 3.19454800  | 1.18212400  | -1.95040300 |
| H | 4.22213900  | -0.22002100 | -2.18930400 |
| H | 4.13859300  | 0.52918500  | -0.58594300 |
| H | 0.83510000  | -1.65127600 | -2.37125100 |
| H | 2.47923200  | -2.23703400 | -2.66925800 |
| H | 1.97697000  | -0.66647300 | -3.30463700 |
| H | -0.19057800 | 4.10200700  | -0.52031300 |
| H | -1.13676000 | 3.23055400  | 0.66427800  |
| H | 0.12219000  | -1.93594800 | 2.25697300  |
| H | -0.60586000 | 2.15097800  | -2.16663000 |
| H | -1.93209400 | 3.24322200  | -1.80031000 |
| H | -4.04136000 | 2.34404100  | -0.71079500 |
| H | -3.99461300 | 0.80580900  | 0.15483300  |
| H | -3.10506500 | 2.20167000  | 0.76773000  |
| H | -1.04559300 | -0.07423200 | -2.05921800 |
| H | -3.08142800 | -1.57323300 | -2.16482900 |
| H | -3.59450000 | -1.03419800 | -0.58283900 |
| C | 1.04850700  | 1.66604400  | 1.29075000  |
| C | -1.88270800 | -2.37866700 | -0.57751400 |
| H | -2.52393500 | -3.27081400 | -0.55919000 |
| H | -1.05696400 | -2.61927700 | -1.25673800 |
| C | -2.46462300 | -1.97351000 | 1.87734400  |
| H | -3.14788100 | -2.83220200 | 1.85990300  |
| H | -2.04781500 | -1.89207900 | 2.88509800  |
| H | -3.07555400 | -1.08161800 | 1.69322200  |

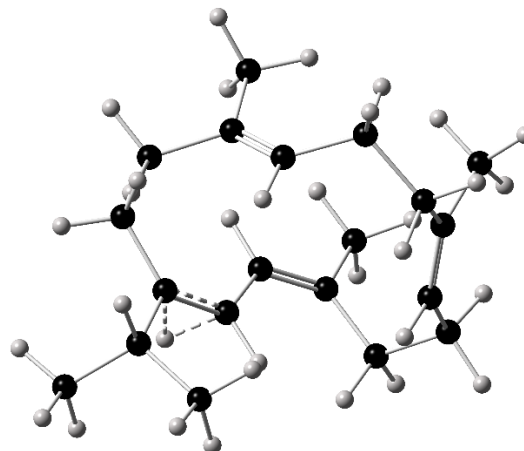

Calculation Method = RmPW1PW91  
 Basis Set = 6-311+G(d,p)  
 Charge = 1  
 Spin = Singlet  
 Solvation = scrf=(cpcm,solvent=water)  
 E(RmPW1PW91) = -781.76495 Hartree  
 RMS Gradient Norm = 0.001539212 Hartree/Bohr  
 Imaginary Freq = 1  
 Dipole Moment = 7.6062157 Debye  
 Polarizability (?) = 327.273 a.u.  
 Point Group = C1  
 Job cpu time: 0 days 19 hours 29 minutes 15.6 seconds.

**Thermo Tab Data Section:**

Imaginary Freq = 1  
 Temperature = 298.15 Kelvin  
 Pressure = 1 atm  
 Frequencies scaled by = 1  
 Electronic Energy (EE) = -781.76495 Hartree  
 Zero-point Energy Correction = 0.480876 Hartree  
 Thermal Correction to Energy = 0.502866 Hartree  
 Thermal Correction to Enthalpy = 0.50381 Hartree  
 Thermal Correction to Free Energy = 0.432763 Hartree  
 EE + Zero-point Energy = -781.28408 Hartree  
 EE + Thermal Energy Correction = -781.26209 Hartree  
 EE + Thermal Enthalpy Correction = -781.26114 Hartree  
 EE + Thermal Free Energy Correction = -781.33219 Hartree  
 E (Thermal) = 315.553 kcal/mol  
 Heat Capacity (Cv) = 87.959 cal/mol-kelvin  
 Entropy (S) = 149.531 cal/mol-kelvin



**Supplementary Note Table 5.** Atomic coordinates and energies for DFT calculated intermediate C<sup>+</sup>.

**Intermediate C<sup>+</sup>**

|   |             |             |             |
|---|-------------|-------------|-------------|
| C | 0.85568500  | -2.19715400 | 1.91844800  |
| C | -1.18398700 | 0.20986900  | -0.36399700 |
| C | -2.04784700 | -2.06364200 | 0.49976200  |
| C | -2.24949800 | -0.82726300 | -0.43989300 |
| C | -0.86603100 | -3.00551700 | 0.20258600  |
| C | 1.42646400  | -2.41915300 | -0.53523400 |
| C | -2.70678100 | -1.08079000 | -1.91147600 |
| C | -1.65505500 | -1.67926800 | -2.86171200 |
| C | -4.01128600 | -1.89083300 | -1.96236000 |
| C | 2.90628200  | -2.17628700 | -0.46126000 |
| C | -0.89288400 | 0.95189800  | 0.77259200  |
| C | -0.17393600 | 2.14904200  | 0.78122300  |
| H | 1.06901800  | -2.67652200 | -1.53363800 |
| H | -3.10770300 | -0.32377800 | 0.04500900  |
| C | 3.41185900  | -0.92499600 | -1.23550600 |
| C | 3.12040600  | 0.39488900  | -0.55698300 |
| C | 3.87093200  | 0.64106300  | 0.72946500  |
| C | 2.27922000  | 1.27400200  | -1.13108100 |
| C | 1.90679400  | 2.64223000  | -0.64995400 |
| H | 0.76763600  | -3.11509900 | 2.51492300  |
| H | 0.15916500  | -1.47493900 | 2.36299300  |
| H | 1.86438100  | -1.80500700 | 2.05945700  |
| H | -2.97875400 | -2.63744100 | 0.45843600  |
| H | -1.97508700 | -1.69833100 | 1.53103600  |
| H | -0.70221900 | 0.49748400  | -1.29563200 |
| H | -0.93116200 | -3.37843100 | -0.82143200 |
| H | -1.01734100 | -3.88208600 | 0.85129000  |
| H | -2.94455600 | -0.07792500 | -2.29793200 |
| H | -1.98434100 | -1.55036300 | -3.89797200 |
| H | -1.51859400 | -2.75259300 | -2.70110100 |
| H | -0.67293800 | -1.19995600 | -2.77078100 |
| H | -4.78566600 | -1.45923900 | -1.31721100 |
| H | -3.85638700 | -2.93197900 | -1.65789500 |
| H | -4.40398100 | -1.90621200 | -2.98399600 |
| H | 3.39459200  | -3.04839100 | -0.91848700 |
| H | 3.26032400  | -2.14397800 | 0.57252000  |
| H | -1.31972000 | 0.62587100  | 1.71946100  |
| H | 2.98686800  | -0.93212400 | -2.24616100 |
| H | 4.49905900  | -1.02989300 | -1.35143900 |
| H | 4.95244800  | 0.58153800  | 0.55147500  |
| H | 3.66660300  | 1.61526000  | 1.17826400  |
| H | 3.64129800  | -0.12332600 | 1.48197000  |
| H | 1.83804400  | 0.99689700  | -2.09039200 |
| H | 2.17282300  | 3.38664200  | -1.41136000 |
| H | 2.44108000  | 2.92527300  | 0.26019500  |
| C | 0.52522000  | -2.47336400 | 0.47101200  |
| C | 0.35749000  | 2.83083700  | -0.43286700 |
| H | 0.18117400  | 3.90685400  | -0.31249900 |
| H | -0.16048700 | 2.51812800  | -1.34214900 |
| C | 0.02294800  | 2.85510500  | 2.08246000  |
| H | -0.68553100 | 3.69620800  | 2.14236900  |
| H | -0.14448600 | 2.21004000  | 2.94784300  |
| H | 1.02175100  | 3.30217700  | 2.14412900  |

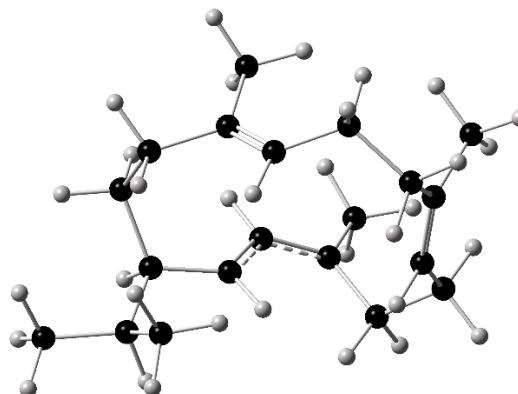

Calculation Type = FREQ  
 Calculation Method = RmPW1PW91  
 Basis Set = 6-311+G(d,p)  
 Charge = 1  
 Spin = Singlet  
 Solvation = scrf=(cpcm,solvent=water)  
 E(RmPW1PW91) = -781.78102 Hartree  
 RMS Gradient Norm = 0.001682506 Hartree/Bohr  
 Imaginary Freq = 0  
 Dipole Moment = 7.2346105 Debye  
 Polarizability (?) = 350.77367 a.u.  
 Point Group = C1  
 Job cpu time: 0 days 18 hours 58 minutes 24.2 seconds.

Thermo Tab Data Section:  
 Imaginary Freq = 0  
 Temperature = 298.15 Kelvin  
 Pressure = 1 atm  
 Frequencies scaled by = 1  
 Electronic Energy (EE) = -781.78102 Hartree  
 Zero-point Energy Correction = 0.483358 Hartree  
 Thermal Correction to Energy = 0.505889 Hartree  
 Thermal Correction to Enthalpy = 0.506833 Hartree  
 Thermal Correction to Free Energy = 0.434482 Hartree  
 EE + Zero-point Energy = -781.29766 Hartree  
 EE + Thermal Energy Correction = -781.27513 Hartree  
 EE + Thermal Enthalpy Correction = -781.27418 Hartree  
 EE + Thermal Free Energy Correction = -781.34653 Hartree  
 E (Thermal) = 317.45 kcal/mol  
 Heat Capacity (Cv) = 89.108 cal/mol-kelvin  
 Entropy (S) = 152.275 cal/mol-kelvin

**Supplementary Note Table 6.** Atomic coordinates and energies for DFT calculated transition state **TS<sub>CD</sub>**.

**Transition state TS<sub>CD</sub>**

|   |             |             |             |
|---|-------------|-------------|-------------|
| C | 0.96539200  | -1.33959100 | 0.25949500  |
| C | 2.52376800  | 0.34089700  | 1.39605700  |
| C | 2.15253200  | -0.54663900 | 0.24906700  |
| C | 2.21194300  | 1.84079700  | 1.03648600  |
| C | 0.28705100  | 2.40169400  | -0.41007900 |
| C | 3.11150200  | -0.60542100 | -0.92905300 |
| C | 4.34003800  | -1.49163500 | -0.59352600 |
| C | 2.48697100  | -1.01175900 | -2.27152100 |
| C | -1.06457500 | 2.88735100  | -0.85698100 |
| C | -0.07265700 | -1.39830000 | 1.28757000  |
| C | -1.26489600 | -2.02390900 | 1.12723100  |
| H | 0.99300700  | 2.26058300  | -1.23323800 |
| H | 0.72807500  | -1.81039500 | -0.68978700 |
| C | -1.81727300 | 1.91334600  | -1.80451600 |
| C | -2.47900100 | 0.72637300  | -1.13180800 |
| C | -3.55663600 | 1.07858000  | -0.13214500 |
| C | -2.14445900 | -0.52950400 | -1.47501000 |
| C | -2.73053600 | -1.81832600 | -0.96464000 |
| H | 3.59823900  | 0.26747900  | 1.59288400  |
| H | 1.99511400  | 0.06666400  | 2.31100700  |
| H | 1.94855900  | -1.95601900 | 0.65365300  |
| H | 2.79391900  | 2.11704900  | 0.15153600  |
| H | 2.62651400  | 2.42104000  | 1.87056100  |
| H | 3.48319200  | 0.42340400  | -1.02149900 |
| H | 5.07573800  | -1.40661000 | -1.39814100 |
| H | 4.04784100  | -2.54594700 | -0.51727400 |
| H | 4.83005500  | -1.19794000 | 0.33937800  |
| H | 1.59643100  | -0.41907700 | -2.50504700 |
| H | 2.21990000  | -2.07447200 | -2.30054100 |
| H | 3.21634600  | -0.84749100 | -3.06986300 |
| H | -0.90533500 | 3.82230900  | -1.41241900 |
| H | -1.69943100 | 3.15110800  | -0.00661700 |
| H | 0.13687300  | -0.92645600 | 2.24202500  |
| H | -1.12994000 | 1.56745000  | -2.58706500 |
| H | -2.59744000 | 2.49514200  | -2.31553900 |
| H | -4.23097000 | 1.83780000  | -0.54787900 |
| H | -4.16891500 | 0.22395500  | 0.16293200  |
| H | -3.13222000 | 1.50869300  | 0.78442700  |
| H | -1.37210500 | -0.65238100 | -2.23810100 |
| H | -3.05143500 | -2.43504300 | -1.81445700 |
| H | -3.62532100 | -1.64176700 | -0.36220500 |
| C | 0.75106900  | 2.19795100  | 0.83503500  |
| C | -1.72839500 | -2.69039900 | -0.14388300 |
| H | -2.23213000 | -3.62899600 | 0.11788000  |
| H | -0.89013800 | -2.96517300 | -0.79275100 |
| C | -2.24557300 | -2.04220100 | 2.26809000  |
| H | -2.45532800 | -3.07771800 | 2.56678100  |
| H | -1.88046800 | -1.49812000 | 3.14296700  |
| H | -3.20633100 | -1.60657200 | 1.96854400  |
| C | -0.04747500 | 2.38890800  | 2.10225800  |
| H | 0.04424600  | 1.52501500  | 2.77422300  |
| H | 0.32222500  | 3.25702100  | 2.66453300  |
| H | -1.11131400 | 2.54463500  | 1.91432700  |

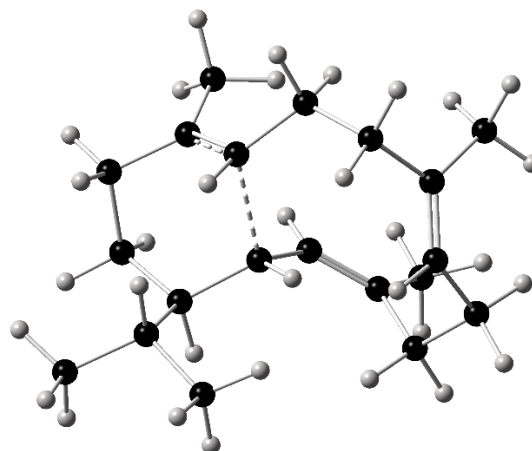

Calculation Type = FREQ  
 Calculation Method = RmPW1PW91  
 Basis Set = 6-311+G(d,p)  
 Charge = 1  
 Spin = Singlet  
 Solvation = scrf=(cpcm,solvent=water)  
 E(RmPW1PW91) = -781.77849 Hartree  
 RMS Gradient Norm = 0.001617416 Hartree/Bohr  
 Imaginary Freq = 1  
 Dipole Moment = 5.3776691 Debye  
 Polarizability (?) = 326.65867 a.u.  
 Point Group = C1  
 Job cpu time: 0 days 20 hours 1 minutes 47.0 seconds.

Thermo Tab Data Section:  
 Imaginary Freq = 1  
 Temperature = 298.15 Kelvin  
 Pressure = 1 atm  
 Frequencies scaled by = 1  
 Electronic Energy (EE) = -781.77849 Hartree  
 Zero-point Energy Correction = 0.484129 Hartree  
 Thermal Correction to Energy = 0.505264 Hartree  
 Thermal Correction to Enthalpy = 0.506209 Hartree  
 Thermal Correction to Free Energy = 0.437456 Hartree  
 EE + Zero-point Energy = -781.29436 Hartree  
 EE + Thermal Energy Correction = -781.27323 Hartree  
 EE + Thermal Enthalpy Correction = -781.27229 Hartree  
 EE + Thermal Free Energy Correction = -781.34104 Hartree  
 E (Thermal) = 317.058 kcal/mol  
 Heat Capacity (Cv) = 86.082 cal/mol-kelvin  
 Entropy (S) = 144.701 cal/mol-kelvin

**Supplementary Note Table 7.** Atomic coordinates and energies for DFT calculated intermediate **D<sup>+</sup>**.

**Intermediate D<sup>+</sup>**

|   |             |             |             |
|---|-------------|-------------|-------------|
| C | 0.98635500  | 3.21747200  | 0.98296900  |
| C | 0.44824900  | -0.13940700 | 0.12116100  |
| C | 2.68584500  | 0.28132000  | 1.22127500  |
| C | 1.85644400  | -0.72977000 | 0.42533400  |
| C | 2.86460600  | 1.61961900  | 0.38645900  |
| C | 0.63269300  | 1.32828200  | -0.71368000 |
| C | 2.57997000  | -1.33380400 | -0.81858100 |
| C | 4.02259300  | -1.76656400 | -0.49894400 |
| C | 1.80832100  | -2.53739500 | -1.39009700 |
| C | -0.64995600 | 2.03924000  | -1.19468500 |
| C | -0.46505400 | -0.02885900 | 1.30662100  |
| C | -1.45179400 | -0.89467500 | 1.63132000  |
| C | -2.25138000 | -0.68452800 | 2.89335900  |
| C | -1.83562400 | -2.12679500 | 0.82910900  |
| H | 1.21640800  | 0.98028400  | -1.57379400 |
| H | -0.03673000 | -0.73636900 | -0.64625200 |
| C | -1.60677300 | 1.24359900  | -2.12420000 |
| C | -2.57390000 | 0.38780300  | -1.33142900 |
| C | -3.64325700 | 1.14158600  | -0.57499000 |
| C | -2.40772500 | -0.94202700 | -1.28196200 |
| C | -2.94710500 | -1.88131800 | -0.24532100 |
| H | 1.64931400  | 3.47702100  | 1.81098000  |
| H | 0.93101100  | 4.09267800  | 0.31030600  |
| H | -0.03844400 | 3.06029200  | 1.33404800  |
| H | 3.68931600  | -0.07812700 | 1.45851400  |
| H | 2.19761100  | 0.51350200  | 2.17359400  |
| H | 1.66623600  | -1.57172100 | 1.10699300  |
| H | 3.36558100  | 1.35896600  | -0.55049000 |
| H | 3.47129900  | 2.33207500  | 0.94993300  |
| H | 2.63569500  | -0.57228400 | -1.61232800 |
| H | 4.46023700  | -2.28012000 | -1.36061500 |
| H | 4.04854300  | -2.46449100 | 0.34724400  |
| H | 4.68121500  | -0.92405900 | -0.26303700 |
| H | 0.79408600  | -2.28577800 | -1.71730300 |
| H | 1.73340100  | -3.34116400 | -0.64715200 |
| H | 2.33177400  | -2.94304600 | -2.26153300 |
| H | -0.30857300 | 2.93063900  | -1.73825800 |
| H | -1.22151200 | 2.40747100  | -0.33862400 |
| H | -0.27507200 | 0.78161200  | 2.01003300  |
| H | -2.09291300 | -1.51273700 | 3.59624600  |
| H | -3.32690300 | -0.66905300 | 2.67330200  |
| H | -1.99483600 | 0.24918600  | 3.40241100  |
| H | -0.96185800 | -2.55646000 | 0.32669800  |
| H | -2.19504100 | -2.89470000 | 1.52466800  |
| H | -1.02706400 | 0.63135800  | -2.82666300 |
| H | -2.15045300 | 1.98179000  | -2.72794500 |
| H | -4.37436000 | 0.47817700  | -0.10914000 |
| H | -3.23333200 | 1.78242600  | 0.21674200  |
| H | -4.19030300 | 1.80146500  | -1.26095000 |
| H | -1.65578000 | -1.38319300 | -1.94071300 |
| H | -3.20878300 | -2.85322800 | -0.67952600 |
| H | -3.84828400 | -1.49437300 | 0.23944100  |
| C | 1.49224400  | 2.08988100  | 0.17181000  |

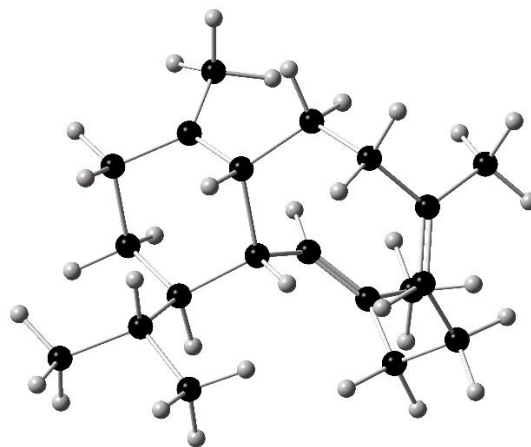

Calculation Type = FREQ  
 Calculation Method = RmPW1PW91  
 Basis Set = 6-311+G(d,p)  
 Charge = 1  
 Spin = Singlet  
 Solvation = scrf=(cpcm,solvent=water)  
 E(RmPW1PW91) = -781.78808 Hartree  
 RMS Gradient Norm = 0.001798224 Hartree/Bohr  
 Imaginary Freq = 0  
 Dipole Moment = 8.5242093 Debye  
 Polarizability (?) = 316.877 a.u.  
 Point Group = C1  
 Job cpu time: 0 days 20 hours 11 minutes 14.1 seconds.

Thermo Tab Data Section:  
 Imaginary Freq = 0  
 Temperature = 298.15 Kelvin  
 Pressure = 1 atm  
 Frequencies scaled by = 1  
 Electronic Energy (EE) = -781.78808 Hartree  
 Zero-point Energy Correction = 0.484982 Hartree  
 Thermal Correction to Energy = 0.506367 Hartree  
 Thermal Correction to Enthalpy = 0.507311 Hartree  
 Thermal Correction to Free Energy = 0.438158 Hartree  
 EE + Zero-point Energy = -781.30309 Hartree  
 EE + Thermal Energy Correction = -781.28171 Hartree  
 EE + Thermal Enthalpy Correction = -781.28076 Hartree  
 EE + Thermal Free Energy Correction = -781.34992 Hartree  
 E (Thermal) = 317.75 kcal/mol  
 Heat Capacity (Cv) = 87.143 cal/mol-kelvin  
 Entropy (S) = 145.546 cal/mol-kelvin

## References

1. Citron, C. A. *et al.* Synthesis of Isotopically Labelled Oligoprenyl Diphosphates and Their Application in Mechanistic Investigations of Terpene Cyclases: Isotopically Labelled Oligoprenyl Diphosphates. *Eur. J. Org. Chem.* **2014**, 7684–7691 (2014).
2. Dixit, V. M., Laskovics, F. M., Noall, W. I. & Poulter, C. D. Tris(tetrabutylammonium) hydrogen pyrophosphate. A new reagent for the preparation of allylic pyrophosphate esters. *J. Org. Chem.* **46**, 1967–1969 (1981).
3. Chen, B.-W. *et al.* Klysimplexins I–T, eunicellin-based diterpenoids from the cultured soft coral *Klyxum simplex*. *Org. Biomol. Chem.* **9**, 834–844 (2011).
4. Meguro, A., Tomita, T., Nishiyama, M. & Kuzuyama, T. Identification and Characterization of Bacterial Diterpene Cyclases that Synthesize the Cembrane Skeleton. *ChemBioChem* **14**, 316–321 (2013).
5. Wiemer, D. F., Meinwald, J., Prestwich, G. D. & Miura, I. Cembrene A and (3Z)-cembrene A: diterpenes from a termite soldier (Isoptera Termitidae Termitinae). *J. Org. Chem.* **44**, 3950–3952 (1979).
6. Gaussian 16, Revision C.01, Frisch, M. J.; Trucks, G. W.; Schlegel, H. B.; Scuseria, G. E.; Robb, M. A.; Cheeseman, J. R.; Scalmani, G.; Barone, V.; Petersson, G. A.; Nakatsuji, H.; Li, X.; Caricato, M.; Marenich, A. V.; Bloino, J.; Janesko, B. G.; Gomperts, R.; Mennucci, B.; Hratchian, H. P.; Ortiz, J. V.; Izmaylov, A. F.; Sonnenberg, J. L.; Williams-Young, D.; Ding, F.; Lipparini, F.; Egidi, F.; Goings, J.; Peng, B.; Petrone, A.; Henderson, T.; Ranasinghe, D.; Zakrzewski, V. G.; Gao, J.; Rega, N.; Zheng, G.; Liang, W.; Hada, M.; Ehara, M.; Toyota, K.; Fukuda, R.; Hasegawa, J.; Ishida, M.; Nakajima, T.; Honda, Y.; Kitao, O.; Nakai, H.; Vreven, T.; Throssell, K.; Montgomery, J. A., Jr.; Peralta, J. E.; Ogliaro, F.; Bearpark, M. J.; Heyd, J. J.; Brothers, E. N.; Kudin, K. N.; Staroverov, V. N.; Keith, T. A.; Kobayashi, R.; Normand, J.; Raghavachari, K.; Rendell, A. P.; Burant, J. C.; Iyengar, S. S.; Tomasi, J.; Cossi, M.; Millam, J. M.; Klene, M.; Adamo, C.; Cammi, R.; Ochterski, J. W.; Martin, R. L.; Morokuma, K.; Farkas, O.; Foresman, J. B.; Fox, D. J. Gaussian, Inc., Wallingford CT, 2016.
